# C-reactive protein and ART outcomes: a systematic review

Sophie Brouillet<sup>1,2,3,4</sup>, Guilaine Boursier<sup>5</sup>, Margaux Anav<sup>4</sup>,  
Bertille Du Boulet De La Boissière<sup>4</sup>, Anna Gala<sup>4</sup>,  
Alice Ferrieres-Hoa<sup>4</sup>, and Isabelle Tuitou<sup>5,6</sup>, and  
Samir Hamamah<sup>3,4,\*</sup> 

<sup>1</sup>Université Grenoble-Alpes, Inserm I036, Commissariat à l'Énergie Atomique et aux Énergies Alternatives (CEA), Institut de Biosciences et Biotechnologies de Grenoble (BIG), Laboratoire Biologie du Cancer et de l'Infection (BCI), 38000 Grenoble, France <sup>2</sup>Centre Hospitalier Universitaire de Grenoble, Hôpital Couple-Enfant, Centre Clinique et Biologique d'Assistance Médicale à la Procréation-Centre d'Étude et de Conservation des Oeufs et du Spermé Humains (CECOS), La Tronche, France <sup>3</sup>Univ Montpellier, Développement Embryonnaire Précoce Humain et Pluripotence, INSERM I203, Montpellier, France <sup>4</sup>CHU Montpellier, Univ Montpellier, Département de Biologie de la Reproduction, Biologie de la Reproduction et Diagnostic Pre-Implantatoire, Montpellier, France <sup>5</sup>CHU Montpellier, Univ Montpellier, Département de Génétique Médicale, Maladies Rares et Médecine Personnalisée, Génétique des Maladies Rares et Autoinflammatoires, Montpellier, France <sup>6</sup>Cellules Souches, Plasticité Cellulaire, Médecine Régénératrice et Immunothérapies, INSERM, Univ de Montpellier, Montpellier, France

\*Correspondence address. Service de Biologie de la Reproduction/DPI, Hôpital Arnaud de Villeneuve, 34295 Montpellier, Cedex 5, France. Tel: + 33 4 67 33 64 04; Fax: + 33 4 67 33 62 90; E-mail: s-hamamah@chu-montpellier.fr  <https://orcid.org/0000-0001-7357-285X>

Submitted on September 16, 2019; resubmitted on January 17, 2020; editorial decision on March 9, 2020

## TABLE OF CONTENTS

- Introduction
  - Chronic low-grade inflammation and C-reactive protein
  - Circulating CRP in women of reproductive age
  - Circulating CRP in infertile women
- Methods
  - Registration
  - Search
  - Study selection
  - Data extraction
  - Quality assessment
- Results
  - Study selection
  - Quality assessment and study characteristics
  - Serum CRP quantification before embryo implantation and ART outcomes
  - Serum CRP quantification during early embryo implantation and ART outcomes
- Discussion
  - Available data on circulating CRP concentration and ART outcomes
  - Clinical benefits and limitations of CRP quantification for predicting ART outcomes
  - CRP-lowering therapeutic options and ART outcomes
- Conclusions

**BACKGROUND:** A dynamic balance between pro- and anti-inflammatory factors contributes to regulating human female reproduction. Chronic low-grade inflammation has been detected in several female reproductive conditions, from anovulation to embryo implantation failure. C-reactive protein (CRP) is a reliable marker of inflammation that is extensively used in clinical practice. Recent studies quantified CRP in the serum of infertile women undergoing ART and suggested its potential for the prediction of ART reproductive outcomes.

**OBJECTIVE AND RATIONALE:** The first objective of this systematic review of the available literature was to evaluate the association between pre-implantation circulating CRP concentration and pregnancy rates in women undergoing ART. The second objective was to describe serum CRP concentration changes after early embryo implantation. The changes in circulating CRP throughout the ART cycle, clinical implications of CRP quantification for the management of women undergoing ART, and future therapeutic options will also be discussed.

**SEARCH METHODS:** The MEDLINE database was systematically searched from inception to March 2019 using the following key words: (C-reactive protein) AND (assisted reproductive techniques OR ovulation induction OR insemination OR in vitro fertilization). Only articles in English were considered. Studies were selected based on title and abstract. The full text of potentially relevant articles was retrieved and assessed for inclusion by two reviewers (S.B. and S.H.). The protocol was registered in the International prospective register of systematic reviews (PROSPERO; registration number: CRD148687).

**OUTCOMES:** In total, 10 studies were included in this systematic review. Most of these studies reported lower circulating CRP values before the window of implantation and higher circulating CRP values during the peri-implantation period in women with successful ART outcome (biochemical or clinical pregnancy) compared to women without a successful outcome. Several lifestyle factors and/or drugs that reduce the concentration of circulating CRP significantly improve ART outcomes. Subgroup analyses according to female BMI and baseline circulating CRP concentration are highly recommended in future analyses.

**WIDER IMPLICATIONS:** These findings highlight a possible detrimental impact of preconception high circulating CRP concentration on ART outcomes. However, the biochemical or clinical pregnancy rate endpoints used in the studies examined here are insufficient (there were no data on live birth outcome), and the impact of major variables that can influence CRP and/or ART, for example maternal age, BMI, number of transferred embryos, and use of anti-inflammatory drugs, were not considered in the analyses. CRP quantification may be a potential marker of ART outcome, but its predictive value still needs to be investigated in large prospective studies. In future, the quantification of circulating CRP before starting ART could help to identify patients with a poor ART prognosis, leading to ART cycle cancellation or to preconception treatment to minimize the medical risks and costs.

**Key words:** C-reactive protein / inflammation / reproductive techniques / infertility / IVF / insemination / pregnancy

## Introduction

Inflammatory molecules (e.g. cytokines, growth factors and hormones) and immune cells (e.g. macrophages, neutrophils and lymphocytes) play a critical role in ovarian folliculogenesis, ovulation and embryo implantation (reviewed in *Vinatier et al., 1995, Gaytan, Morales, Bellido, Sanchez-Criado, & Gaytan, 2006, van Mourik, Macklon, & Heijnen, 2009, Mor, Cardenas, Abrahams, & Guller, 2011, Granot, Gnainsky, & Dekel, 2012, Dekel, Gnainsky, Granot, Racicot, & Mor, 2014, Boots & Jungheim, 2015*). Hence, aberrant inflammation can affect female fertility. The use of non-steroidal anti-inflammatory drugs consistently inhibits ovulation in mammals, including humans (reviewed in *Gaytan et al., 2006*). In addition, the number (*Chen et al., 2007*) and quality (*Lee et al., 2000*) of oocytes were reduced in women with increased levels of serum resistin and intrafollicular tumor necrosis factor (TNF)- $\alpha$  (two pro-inflammatory factors) during IVF. In agreement, transcriptomic analysis of granulosa cells revealed that an imbalance between pro-inflammatory and anti-inflammatory mediators was associated with IVF failure (*Fortin et al., 2019*). Successful embryo implantation also requires proper local and systemic inflammatory responses (reviewed in *Mor et al., 2011, Dekel et al., 2014*). Endometrial decidualization is initially characterized by an acute-phase inflammatory response followed by a strong anti-inflammatory response (*Salker et al., 2012*), thus balancing receptivity and selectivity of the human endometrium towards the growing embryo (*Macklon & Brosens, 2014*). In IVF, increased expression of pro-inflammatory proteins has been observed in endometrial fluid samples collected immediately before embryo transfer in women who did not achieve pregnancy (*Azkargorta et al., 2018*), suggesting that elevated local inflammation is detrimental for embryo implantation. Indeed, increased endometrial inflammation adversely affects embryo implantation, an effect that underlies the

concept of contraceptive intrauterine devices (*Ortiz and Croxatto 2007*). Moreover, increased inflammation has detrimental effects on the embryo-maternal crosstalk, resulting in impaired trophoblast-endometrial interactions (*Weiss, Goldsmith, Taylor, Bellet, & Taylor, 2009*), poor reproductive outcomes (*Vannuccini et al., 2016*), early pregnancy loss and pathological implantation sites (*Salker et al., 2012*).

As the dynamic balance of pro- and anti-inflammatory factors is necessary for successful pregnancy, chronic low-grade production of inflammatory factors might have deleterious effects on female fertility (*Lee et al., 2000; Chen et al., 2007; Weiss et al., 2009; Vannuccini et al., 2016*). Chronic low-grade inflammation is a common condition that affects 20 to 40% of women of reproductive age (*Sjaarda et al., 2018*). It is also associated with several reproductive pathologies, such as polycystic ovary syndrome (PCOS) (*Kelly et al., 2001; Agacayak et al., 2015; Kahyaoglu et al., 2017*), endometriosis (*Ahn et al., 2015; Monsanto et al., 2016; Wu et al. 2017*) and ovarian hyperstimulation syndrome (OHSS) (*Orvieto, 2004; Nastri, Ferriani, Rocha, & Martins, 2010; Nastri, Teixeira, Moroni, Leitao, & Martins, 2015*).

### Chronic low-grade inflammation and C-reactive protein

C-reactive protein (CRP) participates in the non-specific immune response (*Pepys & Hirschfield, 2003; Thiele et al., 2015*) and is a reliable marker of inflammation that is widely used in clinical practice (*Pepys & Hirschfield, 2003; Ansar & Ghosh, 2013; Thiele et al., 2015; Bray et al., 2016*). CRP is synthesized primarily by hepatocytes in response to a variety of inflammatory cytokines (*Pepys & Hirschfield, 2003*), but extra-hepatic CRP expression also has been detected (e.g. in alveolar macrophages, epithelial cells of the human respiratory tract, arterial smooth muscle-like cells and macrophages and renal cortical

tubular epithelial cells) (Dong & Wright, 1996; Gould & Weiser, 2001; Yasojima, Schwab, McGeer, & McGeer, 2001; Jabs *et al.*, 2003). CRP has a role in the innate immune system (Du Clos, 2000; Pepys & Hirschfield, 2003; Thiele *et al.*, 2015). Similar to immunoglobulins, it activates complement, binds to Fc receptors and acts as an opsonin against various pathogens (Du Clos, 2000). CRP interaction with Fc receptors leads to the production of pro-inflammatory cytokines that enhance the inflammatory response. Unlike immunoglobulins (which recognize specific antigenic epitopes), CRP recognizes altered self and some foreign molecules based on pattern recognition (Du Clos, 2000). Thus, CRP acts as a surveillance molecule, providing an early defense and leading to pro-inflammatory signaling and activation of the humoral, adaptive immune response (Du Clos, 2000).

In healthy subjects, the average circulating CRP concentration is lower than 2 mg/L (Pepys & Hirschfield, 2003; Ansar & Ghosh, 2013). Acute infection and tissue damage cause a major increase in circulating CRP (up to 1000 times) within several hours (Pepys & Hirschfield, 2003; Marnell, Mold, & Du Clos, 2005; Ansar & Ghosh, 2013; Thiele *et al.*, 2015). CRP levels >10 mg/L are considered a sign of ongoing acute inflammation (Biasucci *et al.*, 2004). Circulating CRP concentrations between 2 and 10 mg/L are considered to reflect chronic low-grade inflammation (Pepys & Hirschfield, 2003; Ansar & Ghosh, 2013) that might be caused by different factors (Kushner, Rzewnicki, & Samols, 2006), such as overweight/obesity (Ford, 1999; Visser, Bouter, McQuillan, Wener, & Harris, 1999; Yudkin, Stehouwer, Emeis, & Coppack, 1999; Festa *et al.*, 2001; Rexrode, Pradhan, Manson, Buring, & Ridker, 2003; Thorand *et al.*, 2006; Saltiel & Olefsky, 2017), psychological stress (Coussons-Read, Okun, & Nettles, 2007), unhealthy dietary patterns (Kushner *et al.*, 2006) and genetic polymorphisms (Kluft & de Maat, 2003).

### Circulating CRP in women of reproductive age

Age does not seem to influence serum CRP concentration in women of reproductive age (Wener, Daum, & McQuillan, 2000; Wood *et al.*, 2000; McConnell *et al.*, 2002; Ford *et al.*, 2003; Woodward, Rumley, Lowe, & Tunstall-Pedoe, 2003; Orvieto *et al.*, 2004; Robinson, Pemberton, Laing, & Nardo, 2008). On the other hand, serum CRP concentration is strongly and positively correlated with BMI (Ford, 1999; Visser *et al.*, 1999; Yudkin *et al.*, 1999; Festa *et al.*, 2001; Rexrode *et al.*, 2003; Thorand *et al.*, 2006), including in infertile women undergoing IVF (Wunder *et al.*, 2005; Levin *et al.*, 2007; Robinson *et al.*, 2008; Yildizfer *et al.*, 2015; Buyuk *et al.*, 2017) and in pregnant women (Ertas *et al.*, 2010). Smoking does not seem to have any impact on circulating CRP in women (Koenig *et al.*, 1999; Frohlich, Sund, Lowel, & Imhof, 2003; Robinson *et al.*, 2008). The available findings on CRP concentration changes during the menstrual cycle are conflicting and no robust conclusions can be reached (Jilma *et al.*, 1997; Blum *et al.*, 2005; Puder *et al.*, 2006; Wunder *et al.*, 2006; Capobianco *et al.*, 2010; Gaskins *et al.*, 2012; Lorenz, Worthman, & Vitzthum, 2015). Interestingly, serum CRP levels may differ in ovulatory and anovulatory cycles, suggesting that ovulation (rather than hormone variations) could be more relevant to understanding CRP changes during natural cycles (Capobianco *et al.*, 2010; Lorenz *et al.*, 2015). Sexual activity (Lorenz *et al.*, 2015) and menstrual cycle symptoms (Puder *et al.*, 2006) have been positively associated with increased serum CRP concentrations in women of

reproductive age. Moreover, elevated CRP values have been reported in women with PCOS (Kelly *et al.*, 2001; Escobar-Morreale *et al.*, 2011; Agacayak *et al.*, 2015; Kahyaoglu *et al.*, 2017), OHSS (Orvieto, 2004; Sacks, Seyani, Lavery, & Trew, 2004; Levin *et al.*, 2005; Korhonen, Savolainen-Peltonen, Mikkola, Tiitinen, & Unkila-Kallio, 2016) and endometriosis (Kianpour *et al.*, 2012). Moreover, elevated circulating CRP levels have been negatively associated with natural conception, with a significant reduction in spontaneous pregnancy and live birth rates in women with high preconception CRP levels ( $\geq 1.95$  mg/L) (Sjaarda *et al.*, 2017).

### Circulating CRP in infertile women

Infertility is defined as the inability to conceive after 1 year of sexual relationships without contraception. It concerns ~10–15% of individuals of reproductive age (Practice Committee of the American Society for Reproductive, 2006). ART is widely used to overcome human infertility. Interestingly, controlled ovarian hyperstimulation (COH) and ovarian puncture induce a temporary inflammatory state, as indicated by the increase in circulating inflammatory cytokines (Orvieto *et al.*, 2003; Orvieto, *et al.*, 2006; Persson *et al.*, 2012). Consistently, several studies have reported that circulating CRP concentration increases in women undergoing ART (Table I, Fig. 1, and Supplementary Table SI). Specifically, in IVF, serum CRP concentration significantly increases from the start of COH to the day of ovarian puncture (Fig. 1A) (Orvieto *et al.*, 2004; Orvieto, Fisch, Yulzari-Roll, & La Marca, 2005; Wunder *et al.*, 2005; Orvieto, Zagatsky, Yulzari-Roll, La Marca, & Fisch, 2006; Orvieto *et al.*, 2007; Arefi, Babashamsi, Panahi, Asgharpour Saruiy, & Zeraati, 2010; Liu *et al.*, 2014). The administration of hCG instead of a GnRH agonist for the final follicular maturation in IVF cycles seems to be associated with higher CRP concentrations (Orvieto *et al.*, 2006), suggesting a higher degree of systemic inflammation. Consistently, antagonist cycles are considered to induce less systemic inflammation (Orvieto, 2004; Orvieto *et al.*, 2006; Orvieto *et al.*, 2007). After ovarian puncture, CRP values seem to increase until the window of implantation (WOI) (Almagor, Hazav, & Yaffe, 2004; Arefi *et al.*, 2010; Seckin *et al.*, 2012; Liu *et al.*, 2014; Korhonen *et al.*, 2016) and may fall at the end of the ART cycle in the absence of pregnancy (Almagor *et al.*, 2004; Korhonen *et al.*, 2016). On the other hand, in women undergoing IUI, limited data suggest comparable circulating CRP values from the moment of COH to the luteal phase (Fig. 1B) (Prabhu *et al.*, 2009; Tasdemir *et al.*, 2015; Kahyaoglu *et al.*, 2017; Sahin *et al.*, 2018). The use of clomiphene citrate (Prabhu *et al.*, 2009; Tasdemir *et al.*, 2015; Kahyaoglu *et al.*, 2017; Sahin *et al.*, 2018) instead of FSH and/or the use of lower doses of gonadotrophins during COH may contribute to the limited variations of CRP values during IUI cycles.

Altogether, the detrimental role of chronic low-grade inflammation in female fertility and the higher serum CRP concentration in reproductive disorders suggest that circulating CRP could influence ART outcomes. Therefore, CRP quantification before or during ART may provide a surrogate marker of ART success. The aim of this review was to present the evidence published to date on serum CRP quantification and pregnancy rates in women undergoing ART. The first objective of this review was to determine whether circulating CRP quantification before embryo implantation can predict pregnancy rates in women undergoing ART. The second objective was to describe serum CRP concentration changes after early embryo implantation. Finally, the

**Table 1** Circulating C-reactive protein level detection and variations in women undergoing ART.

| Reference                | ART type | n   | CRP quantification                | Outcome                                                                                                   |
|--------------------------|----------|-----|-----------------------------------|-----------------------------------------------------------------------------------------------------------|
| Prabhu et al., 2009      | IUI      | 42  | Before and after insemination     | No variation in late follicular phase (CC)                                                                |
| Tasdemir et al., 2015    | IUI      | 42  | After insemination                | No variation in luteal phase (CC)                                                                         |
| Kahyaoglu et al., 2017   | IUI      | 60  | Before insemination               | Detection in patients with PCOS (CC)                                                                      |
| Sahin et al., 2018       | IUI      | 63  | Before and after insemination     | Detection in infertile patients (CC or FSH)                                                               |
| Almagor et al., 2004     | IVF      | 72  | Before and after ovarian puncture | Significantly ↑ in late luteal phase (during WOI) (COH protocol?)                                         |
| Sacks et al., 2004       | IVF      | 135 | Before and after ovarian puncture | ↑ in late luteal phase (during WOI) (agonist and antagonist)                                              |
| Orvieto et al., 2004     | IVF      | 16  | Before ovarian puncture           | Significantly ↑ throughout COH (agonist)                                                                  |
| Orvieto et al., 2005     | IVF      | 15  | Before ovarian puncture           | Significantly ↑ in late follicular phase (agonist)                                                        |
| Wunder et al., 2005      | IVF      | 162 | Before ovarian puncture           | Significantly ↑ in late follicular phase (agonist)                                                        |
| Levin et al., 2005       | IVF      | 40  | After ovarian puncture            | Detection in patients undergoing IVF (COH protocol?)                                                      |
| Levin et al., 2007       | IVF      | 28  | Before and after ovarian puncture | Detection in patients undergoing IVF (agonist)                                                            |
| Orvieto et al., 2006     | IVF      | 24  | Before ovarian puncture           | Significantly ↑ in late follicular phase (antagonist)                                                     |
| Orvieto et al., 2007     | IVF      | 27  | Before ovarian puncture           | ↑ across follicular phase (agonist > antagonist)                                                          |
| Robinson et al., 2008    | IVF      | 114 | Before ovarian puncture           | Detection in patients undergoing IVF (agonist)                                                            |
| Arefi et al., 2010       | IVF      | 70  | Before ovarian puncture           | Significantly ↑ in follicular and luteal phase                                                            |
| Seckin et al., 2012      | IVF      | 69  | Before and after ovarian puncture | Significantly ↑ in late luteal phase (during WOI) (agonist)                                               |
| Liu et al., 2014         | IVF      | 70  | Before and after ovarian puncture | Significantly ↑ in luteal phase (during WOI) (agonist and antagonist)                                     |
| Yildizfer et al., 2015   | IVF      | 26  | Before and after ovarian puncture | Detection in patients undergoing IVF (COH protocol?)                                                      |
| Korhonen et al., 2016    | IVF      | 27  | Before and after ovarian puncture | Significantly ↑ across follicular phase, peak after ovarian puncture and ↑ in late luteal phase (agonist) |
| Buyuk et al., 2017       | IVF      | 39  | Before ovarian puncture           | Detection in patients undergoing IVF (agonist and antagonist)                                             |
| El-shawarby et al., 2005 | FET      | 85  | Before and after ovarian puncture | Detection in patients undergoing IVF (agonist)                                                            |

Numeric values are available in [Supplementary Table S1](#).

CRP: C-reactive protein; FET: frozen embryo transfer; CC: clomiphene citrate; WOI: window of implantation; COH: controlled ovarian hyperstimulation; OP: ovarian puncture.

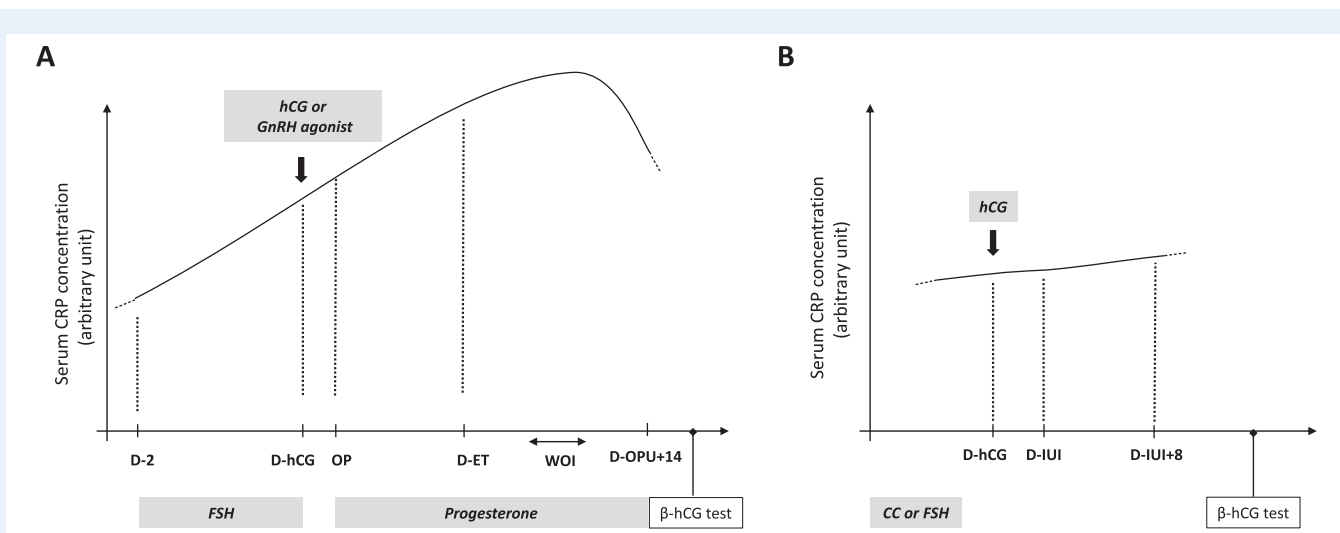

**Figure 1** Proposed model of circulating C-reactive protein concentration dynamics in women undergoing ART. In IVF (A), circulating C-reactive protein (CRP) values rise from the early follicular phase to the window of implantation. In IUI (B), circulating CRP concentration remains similar from the start of controlled ovarian hyperstimulation (COH) to the luteal phase. D: day; WOI: window of implantation; OP: ovarian puncture; ET: embryo transfer; CC: clomiphene citrate.

future clinical implications of CRP quantification for the management of women undergoing ART and the usefulness and limitations of therapeutic approaches targeting CRP concentration in the context of ART will be discussed.

## Methods

The systematic review was conducted according to the Preferred Reporting Items for Systematic Reviews and Meta-analysis (PRISMA) guidelines (Liberati *et al.*, 2009).

### Registration

The protocol was registered in the International prospective register of systematic reviews (PROSPERO); the registration number is CRD42020148687.

### Search

A systematic literature review was performed to identify studies that compared circulating CRP concentration and pregnancy rates in women undergoing ART using the MEDLINE database from inception to March 2019. The search terms were (C-reactive protein) AND (assisted reproductive techniques OR ovulation induction OR insemination OR in vitro fertilization). An additional study identified from the references of the selected full-text articles was also included.

### Study selection

Articles were restricted to English language only. Two reviewers (S.B. and S.H.) independently searched and reviewed the retrieved articles to exclude studies deemed irrelevant by both observers. Studies were first screened for eligibility based on their titles and abstracts. The full texts of potentially relevant articles were retrieved and included if they reported quantification of circulating CRP in women during ART cycles, defined as IUI or IVF +/- ICSI. Exclusion criteria were transfer of frozen embryos and mean basal circulating CRP concentration higher than 10 mg/L (indicating an acute ongoing inflammatory state). Any disagreement or uncertainty was solved by discussion with a third reviewer (G.B.). The final decision was taken by the senior investigator (S.H.).

### Data extraction

The following data were extracted to characterize the included studies: study authors, publication year, ART type, sample size, CRP quantification method and timing, serum CRP concentration and ART outcomes. The following data were extracted to characterize the ART cycles: women's age, women's BMI, number of mature follicles in IUI and number of transferred embryos in IVF. For the first objective, only data corresponding to circulating CRP quantified before the connection between the invading blastocyst and the maternal vessels (i.e. before Day 9 post-ovulation trigger (Lohstroh *et al.*, 2005)) were considered. For the second objective, data corresponding to circulating CRP quantified after the presumed embryo implantation (i.e. after Day 9 post-ovulation trigger) were collected and analyzed. All CRP values between women who achieved pregnancy and women who did not that were reported to be significantly different in the included studies

were denoted as a 'significant decrease' or a 'significant increase' in this manuscript. When non-significant results were reported, a difference in CRP values  $\geq 20\%$  between these groups was denoted as a 'decrease' or an 'increase' in this manuscript. Conversely, if the non-significant difference was lower than 20% between groups, it was defined as 'similar concentrations' in this manuscript. The threshold of 20% was based on the intraindividual variation of circulating CRP levels in women who were tested for different consecutive days (Qi *et al.*, 2016), suggesting that a difference of CRP values below 20% between women who achieved pregnancy and women who did not is biologically irrelevant. Data were extracted independently by two authors (S.B. and M.A.). Any disagreement or uncertainty was solved by discussion.

### Quality assessment

The methodological quality of each study was assessed by two reviewers (S.B. and M.A.) using a modified Newcastle–Ottawa scale (NOS) (Supplementary Table SII). Each study was rated according to six items categorized in three domains: selection, comparability of groups and ascertainment of outcome (maximum scores: 4, 2 and 4, respectively). Scores were represented with stars to provide a visual assessment of each item. Studies that met all the quality requirements obtained 10 points/stars.

## Results

### Study selection

The initial search of studies on CRP concentration and ART outcomes identified 69 potentially relevant articles (Fig. 2). After screening the titles, 44 abstracts were reviewed and 35 full-text articles were assessed for eligibility for the primary objective. After exclusion of articles outside the objective, 14 studies on circulating CRP in women undergoing ART were selected for detailed review (Supplementary Table SIII). Among these 14 studies, four were excluded because circulating CRP was quantified in women undergoing frozen embryo transfer ( $n = 1$ ) (El-Shawarby, Sacks, Seyani, Lavery, & Trew, 2005) or because the mean basal CRP concentration in women undergoing ART was higher than 10 mg/L ( $n = 3$ ) (Levin *et al.*, 2007; Liu *et al.*, 2014; Kahyaoglu *et al.*, 2017). Finally, this systematic review included a total of 10 studies that evaluated the association between CRP levels and ART reproductive outcomes in women undergoing IUI cycles ( $n = 2$ ) and in women undergoing IVF cycles ( $n = 8$ ). For the first objective, 10 studies reported CRP quantification before the WOI and ART reproductive outcomes. For the second objective, four studies evaluated the association between CRP quantification during the peri-implantation period and ART reproductive outcomes.

### Quality assessment and study characteristics

The quality of the included studies was assessed with the modified NOS (Table II). The mean total score was 5.6 (range: 3–8). The selection criteria were fully stated only in one study (Seckin *et al.*, 2012). The comparability between women who did not (non-pregnant) and who did achieve (pregnant) pregnancy was limited because confounding factors, such as female age, female BMI, number of mature follicles (in IUI) and number of transferred embryos (in IVF), were fully controlled only in 20.0% (2/10) of studies (Supplementary Table SIV) (Seckin *et al.*,



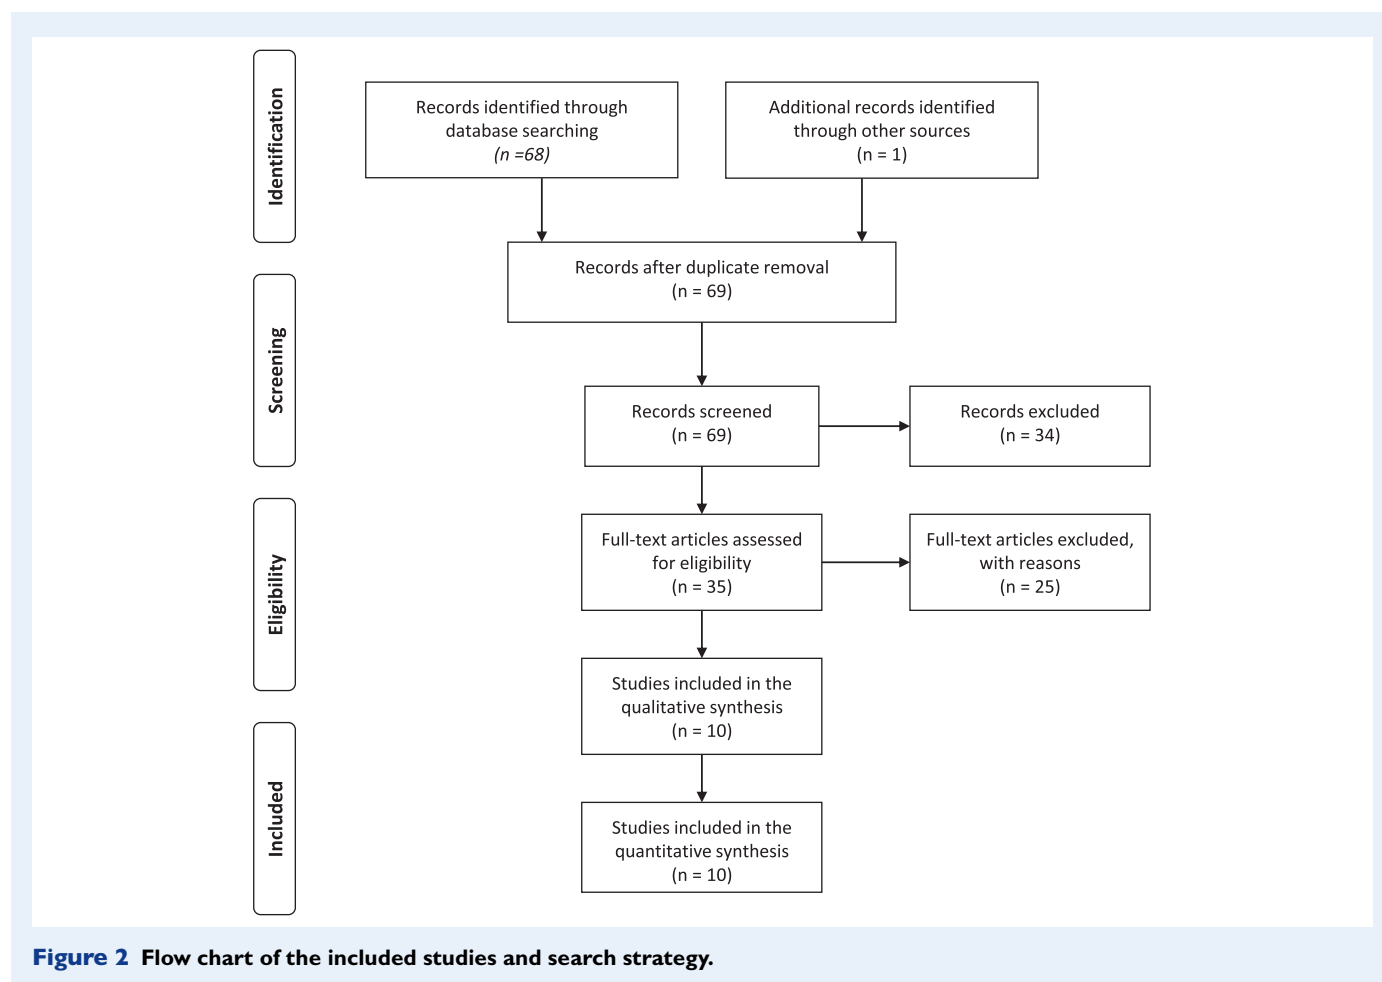

2012; Yildizfer *et al.*, 2015). Five studies evaluated biochemical pregnancy (Wunder *et al.*, 2005; Seckin *et al.*, 2012; Tasdemir *et al.*, 2015; Yildizfer *et al.*, 2015; Sahin *et al.*, 2018), and four studies assessed clinical pregnancy (Almagor *et al.*, 2004; Sacks *et al.*, 2004; Robinson *et al.*, 2008; Buyuk *et al.*, 2017). No information was available on the definition of pregnancy in one study (Arefi *et al.*, 2010). The predictive accuracy of CRP quantification was reported in 20.0% (2/10) of studies (Almagor *et al.*, 2004; Buyuk *et al.*, 2017). The comparison of circulating CRP concentrations between non-pregnant and pregnant women was described with P values in 90.0% (9/10) of studies (Almagor *et al.*, 2004; Sacks *et al.*, 2004; Wunder *et al.*, 2005; Robinson *et al.*, 2008; Arefi *et al.*, 2010; Seckin *et al.*, 2012; Tasdemir *et al.*, 2015; Buyuk *et al.*, 2017; Sahin *et al.*, 2018). Circulating CRP was quantified with high sensitivity CRP (hsCRP) assays, which can detect minor changes in low CRP concentrations, in 66.7% (7/10) of studies (Tables II and III) (Sacks *et al.*, 2004; Wunder *et al.*, 2005; Robinson *et al.*, 2008; Seckin *et al.*, 2012; Tasdemir *et al.*, 2015; Yildizfer *et al.*, 2015; Buyuk *et al.*, 2017). One study used hsCRP only for CRP quantification during the peri-implantation period (but not before the WOI) (Sacks *et al.*, 2004). Serum CRP was quantified using an ELISA in 60.0% (6/10) of studies (Wunder *et al.*, 2005; Robinson *et al.*, 2008; Arefi *et al.*, 2010; Yildizfer *et al.*, 2015; Buyuk *et al.*, 2017), immunoturbidimetry in 30.0% (3/10) of studies (Almagor *et al.*, 2004; Sacks *et al.*, 2004; Seckin *et al.*, 2012) and immunonephelometry in 10.0% (1/10) of studies

(Sahin *et al.*, 2018). No limit of detection was mentioned in 50.0% (5/10) of studies (Almagor *et al.*, 2004; Arefi *et al.*, 2010; Yildizfer *et al.*, 2015; Buyuk *et al.*, 2017; Sahin *et al.*, 2018). The intra-assay and inter-assay coefficients of variation ranged from 1.34% (Seckin *et al.*, 2012) to 10.65% (Wunder *et al.*, 2005) among studies. CRP concentration was expressed in mg/L in 70.0% (7/10) of studies (Almagor *et al.*, 2004; Sacks *et al.*, 2004; Robinson *et al.*, 2008; Arefi *et al.*, 2010; Seckin *et al.*, 2012; Yildizfer *et al.*, 2015; Sahin *et al.*, 2018), as recommended (Myers *et al.*, 2004).

### Serum CRP quantification before embryo implantation and ART outcomes

The association between CRP levels before the WOI and ART outcomes was assessed in women undergoing IUI cycles ( $n = 2$  studies) and IVF cycles ( $n = 8$  studies).

### CRP and IUI outcomes

Two studies reported serum CRP concentration after clomiphene citrate or FSH treatment in women undergoing IUI as well as the biochemical pregnancy rates (Tasdemir *et al.*, 2015; Sahin *et al.*, 2018) (Table IV). Tasdemir *et al.* (2015) compared CRP concentrations after IUI (at Day 2 and Day 8) and found no significant difference in circulating

**Table II** Modified Newcastle–Ottawa scale used for the quality assessment of the included studies.

| References                     | Selection                 |             |                          | Comparability | Assessment of the outcome | Statistical test | NOS score |
|--------------------------------|---------------------------|-------------|--------------------------|---------------|---------------------------|------------------|-----------|
|                                | Description of the cohort | Sample size | CRP quantification assay |               |                           |                  |           |
| Sahin <i>et al.</i> , 2018     | *                         | -           | *                        | *             | *                         | *                | 5         |
| Tasdemir <i>et al.</i> , 2015  | *                         | -           | **                       | *             | *                         | *                | 6         |
| Almagor <i>et al.</i> , 2004   | -                         | -           | -                        | -             | **                        | **               | 4         |
| Sacks <i>et al.</i> , 2004     | *                         | -           | -/#                      | *             | **                        | *                | 5         |
| Wunder <i>et al.</i> , 2005    | *                         | -           | **                       | *             | *                         | *                | 6         |
| Robinson <i>et al.</i> , 2008  | *                         | -           | **                       | -             | **                        | *                | 6         |
| Arefi <i>et al.</i> , 2010     | *                         | *           | -                        | -             | -                         | *                | 3         |
| Seckin <i>et al.</i> , 2012    | *                         | *           | **                       | **            | *                         | *                | 8         |
| Yildizfer <i>et al.</i> , 2015 | *                         | -           | **                       | **            | *                         | -                | 6         |
| Buyuk <i>et al.</i> , 2017     | *                         | -           | **                       | -             | **                        | **               | 7         |

#hs-CRP only for the secondary objective. See also Supplementary Table SII.

CRP between women who did ( $n = 8$ ) and who did not ( $n = 34$ ) achieve biochemical pregnancy.

Sahin *et al.* (2018) found significantly higher CRP levels at ovulation trigger day (i.e. the day of hCG administration) and also at Day 8 post-ovulation trigger in women who did not achieve biochemical pregnancy ( $n = 35$ ,  $2.2 \pm 2.3$  and  $3.3 \pm 3.5$  mg/L, respectively) compared with women with biochemical pregnancy ( $n = 28$ ,  $0.7 \pm 0.5$  and  $0.6 \pm 0.4$  mg/L, respectively) ( $P = 0.001$  for day hCG, and  $P < 0.001$  for Day 8). Moreover, CRP level was significantly higher at Day 8 post-ovulation trigger compared with ovulation trigger day in the non-pregnant group ( $3.3$  and  $2.2$  mg/L, respectively,  $P = 0.003$ ), but not in the pregnant group ( $0.6$  and  $0.7$  mg/L, respectively,  $P = 0.055$ ) (Sahin *et al.*, 2018).

### CRP and IVF outcomes

The relationship between serum CRP concentration at different time points during the IVF cycle and IVF outcome was evaluated in eight studies (Table IV). Specifically, 87.5% (7/8) of studies measured serum CRP concentrations before COH (between Day 1 and Day 3 of the menstrual cycle (Sacks *et al.*, 2004; Wunder *et al.*, 2005; Robinson *et al.*, 2008; Arefi *et al.*, 2010; Seckin *et al.*, 2012; Yildizfer *et al.*, 2015; Buyuk *et al.*, 2017), 25% (2/8) on ovulation trigger day or the day before ovulation trigger (hCG/hCG-1) (Wunder *et al.*, 2005; Arefi *et al.*, 2010), 37.5% (3/8) on ovarian puncture day (Almagor *et al.*, 2004; Wunder *et al.*, 2005; Arefi *et al.*, 2010), 25% (2/8) on the day of fresh embryo transfer (i.e. Day 2 or Day 3 after ovarian puncture) (Almagor *et al.*, 2004; Arefi *et al.*, 2010) and 12.5% (1/8) after embryo transfer (i.e. from Day 5 to Day 7 after ovarian puncture) (Almagor *et al.*, 2004).

Two studies reported significantly higher CRP concentrations before COH in women who subsequently did not achieve pregnancy compared with women who achieved pregnancy (Yildizfer *et al.*, 2015; Buyuk *et al.*, 2017) (Table IV). Moreover, the receiver operating characteristic (ROC) curve analysis to determine the Day 3 CRP cut-off values that predicted clinical pregnancy failure showed that

a serum CRP threshold level  $>0.534$  mg/L was associated with no clinical pregnancy, with a sensitivity of 68%, a specificity of 60% and an AUC of 0.67 (Buyuk *et al.*, 2017). Buyuk *et al.* (2017) also found that the CRP concentration difference between the pregnant and non-pregnant groups was more pronounced in women with diminished ovarian reserve ( $0.241 \pm 0.033$  mg/L for pregnant women versus  $0.983 \pm 0.154$  mg/L for non-pregnant women;  $P = 0.01$ , respectively). In women with diminished ovarian reserve, serum CRP level  $\geq 0.317$  mg/L predicted no clinical pregnancy with a sensitivity of 86%, a specificity of 100% and an AUC of 0.89 (Buyuk *et al.*, 2017). Two additional studies found that CRP values before COH were higher (+39.7% (Wunder *et al.*, 2005) and +33.1% (Sacks *et al.*, 2004)) in non-pregnant women compared with pregnant women (not significant). However, Sacks and colleagues reported that serum CRP levels before COH were below the assay detection limit (i.e. 2 mg/L), weakening the difference between groups. Three studies reported similar CRP values in both groups before COH (i.e. differences lower than 20%) (Robinson *et al.*, 2008; Arefi *et al.*, 2010; Seckin *et al.*, 2012).

During COH, similar CRP values were found in non-pregnant and pregnant women on ovulation trigger day (Wunder *et al.*, 2005; Arefi *et al.*, 2010). On ovarian puncture day, results were contradictory (Almagor *et al.*, 2004; Wunder *et al.*, 2005; Arefi *et al.*, 2010). Wunder *et al.*, 2005 reported higher values (Wunder *et al.*, 2005), whereas Almagor *et al.*, 2004 observed lower concentrations in non-pregnant women compared with pregnant women (not significant in both studies) (Almagor *et al.*, 2004). Arefi and colleagues found similar CRP values in both groups (Arefi *et al.*, 2010).

After ovarian puncture, Arefi and colleagues found a significant decrease of CRP concentrations in non-pregnant women ( $P < 0.001$ ) (Arefi *et al.*, 2010), whereas Almagor *et al.* (2004) reported similar CRP values in both groups. Almagor *et al.* (2004) tested the hypothesis that the ratio of CRP concentration at Day 2 post-ovarian puncture/day of ovarian puncture rather than the daily CRP concentration might significantly differ between successful and unsuccessful ART cycles. They found that this ratio was significantly higher in women who did not achieve pregnancy compared with the pregnant group ( $2.5 \pm 2.7$

**Table III** Methods of CRP quantification in the included studies.

| ART type | Reference              | hsCRP   | Matrix | Method of quantification | Analyzer/kit                                                     | Reference range | LoD         | CV%                                        | Expression of CRP concentration |
|----------|------------------------|---------|--------|--------------------------|------------------------------------------------------------------|-----------------|-------------|--------------------------------------------|---------------------------------|
| IUI      | Sahin et al., 2018     | No?     | Serum  | Immunonephelometry       | IMAGE 800 (Beckman Coulter Inc., Brea, CA, USA)                  | /               | /           | /                                          | mg/L                            |
|          | Tasdemir et al., 2015  | Yes     | Serum  | ELISA                    | BioCheck, Inc., Foster City, USA                                 | /               | 0.1 mg/L    | Intra-assay: 7.5%<br>Inter-assay: 4.1%     | ng/mL                           |
| IVF      | Almagor et al., 2004   | No      | Serum  | Immunoturbidimetry       | Integra-700 chemistry (Roche Diagnostics, Switzerland)           | <5 mg/L         | /           | /                                          | mg/L                            |
|          | Sacks et al., 2004     | No/yes* | Serum  | Immunoturbidimetry       | Olympus Diagnostics, County Clare, Ireland                       | /               | 2 mg/L?     | /                                          | mg/L                            |
|          | Wunder et al., 2005    | Yes     | Serum  | ELISA                    | In-house rabbit polyclonal anti-human CRP antibody (Sigma C3527) | /               | 0.0003 mg/L | Intra-assay: 5.54%<br>Inter-assay: 10.65%  | µg/mL                           |
|          | Robinson et al., 2008  | Yes     | Serum  | ELISA                    | /                                                                | /               | 0.1 mg/L    | Intra-assay: 5.9%<br>between 6.1%          | mg/L                            |
|          | Arefi et al., 2010     | No      | Serum  | ELISA                    | in-house (no kit specified)                                      | /               | /           | /                                          | mg/L                            |
|          | Seckin et al., 2012    | Yes     | Serum  | Immunoturbidimetry       | Roche Diagnostics GmbH, Mannheim, Germany                        | /               | 0.03 mg/L   | Intra-assay: 1.34%<br>between 5.7%         | mg/L                            |
|          | Yildizfer et al., 2015 | Yes     | Serum  | ELISA                    | DRG Int Inc., USA                                                | /               | /           | Intra-assay: 7.2%<br>between 9.8%          | mg/L                            |
|          | Buyuk et al., 2017     | Yes?    | Serum  | ELISA                    | R&D Systems, Inc.                                                | /               | /           | Intra-assay: 4 to 10%<br>between 7 and 10% | ng/mL                           |

hsCRP: high-sensitivity CRP; LoD: limit of detection; CV: coefficient of variation.

\*hs-CRP only for the secondary objective.



**Table IV** Association between serum CRP concentration (mg/L or ratio) and ART outcome.

| Reference              | ART type | Total (n) | Pregnant group (n) | Non-pregnant group (n) | CRP quantification                                                                                   | CRP concentration and outcome                                                                                                                                             | CRP concentration (non-pregnant versus pregnant group) (mg/L or ratio)                                                                         |
|------------------------|----------|-----------|--------------------|------------------------|------------------------------------------------------------------------------------------------------|---------------------------------------------------------------------------------------------------------------------------------------------------------------------------|------------------------------------------------------------------------------------------------------------------------------------------------|
| Tasdemir et al., 2015  | IUI      | 42        | 8                  | 34                     | After insemination (IUI + 2)<br>After insemination (IUI + 8)                                         | ↑ in non-pregnant women (ns)<br>≈ in non-pregnant women (ns)                                                                                                              | 1.02 ± 0.91 versus 0.70 ± 0.53<br>0.99 ± 0.67 versus 1.03 ± 1.46                                                                               |
| Sahin et al., 2018     | IUI      | 63        | 28                 | 35                     | During COH (D-hCG)<br>After insemination (hCG + 8)<br>After COH (D-OPU)<br>After COH (D-OPU + 2)     | Significantly ↑ in non-pregnant women (****)<br>Significantly ↑ in non-pregnant women (****)<br>↓ in non-pregnant women (ns)<br>≈ in non-pregnant and pregnant women (ns) | 2.2 ± 2.3 versus 0.7 ± 0.5<br>3.3 ± 3.5 versus 0.6 ± 0.4<br>5.2 ± 7.6 versus 9.4 ± 11.9<br>6.9 ± 7.4 versus 6.9 ± 6.5                          |
| Almagor et al., 2004   | IVF      | 72        | 22                 | 50                     | After COH (D-OPU + 2/D-OPU ratio)                                                                    | Significantly ↑ in non-pregnant women (**)                                                                                                                                | 2.5 ± 2.7 versus 1.2 ± 1.0; cut-off < 1.85 (sensitivity 86%, specificity 44%)                                                                  |
| Sacks et al., 2004     | IVF      | 135       | 40                 | 95                     | After COH (OPU + 5/7)<br>After COH (D-OPU + 5-7/D-OPU ratio)<br>Before COH (D-2)<br>Before COH (D-1) | ≈ in pregnant women (ns)<br>↑ in non-pregnant women (ns)<br>↑ in non-pregnant women (ns)<br>↑ in non-pregnant women (ns)                                                  | 14.0 ± 12.9 versus 16.0 ± 11.6<br>5.4 ± 7.3 versus 3.4 ± 3.3<br>0.571 ± 2.02 versus 0.429 ± 1.12<br>1.76 (0.12–36.99) versus 1.26 (0.13–35.46) |
| Wunder et al., 2005    | IVF      | 162       | 47                 | 102                    | During COH (D-hCG-1/hCG)<br>After COH (D-OPU)                                                        | ≈ in non-pregnant and pregnant women (ns)<br>↑ in non-pregnant women (ns)                                                                                                 | 1.40 (0.195–87.25) versus 1.25 (0.018–34.25)<br>3.48 (0.21–167.5) versus 2.87 (0.07–33.05)                                                     |
| Robinson et al., 2008  | IVF      | 114       | 41                 | 65                     | Before COH (D-3)<br>Before COH (D-1)                                                                 | ≈ in non-pregnant and pregnant women (ns)<br>≈ in non-pregnant and pregnant women (ns)                                                                                    | 1.17 (0.44–2.73) versus 1.35 (0.48–3.12)<br>3.68 ± 1.88 versus 4.36 ± 1.92                                                                     |
| Arefi et al., 2010     | IVF      | 70        | 30                 | 40                     | During COH (D-hCG)<br>After COH (D-OPU)                                                              | ≈ in non-pregnant and pregnant women (ns)<br>≈ in non-pregnant and pregnant women (ns)                                                                                    | 4.82 ± 1.99 versus 5.10 ± 1.84<br>5.27 ± 1.98 versus 5.90 ± 2.58                                                                               |
| Seckin et al., 2012    | IVF      | 69        | 35                 | 34                     | After COH (D-OPU + 2/3)                                                                              | Significantly ↓ in non-pregnant women (****)                                                                                                                              | 4.84 ± 3.18 versus 8.98 ± 4.18                                                                                                                 |
| Yildizfer et al., 2015 | IVF      | 26        | 8                  | 18                     | At COH start<br>Before COH (D-3)                                                                     | ≈ in non-pregnant and pregnant women (ns)<br>Significantly ↑ in non-pregnant women (P value not available)                                                                | 3.24 ± 2.68 versus 3.61 ± 2.86<br>3.8 ± 0.5 versus 2.8 ± 0.4                                                                                   |
| Buyuk et al., 2017     | IVF      | 39        | 11                 | 27                     | Before COH (D-2/3)                                                                                   | Significantly ↑ in non-pregnant women (*)                                                                                                                                 | 1.01 ± 0.13 versus 0.62 ± 0.14; cut-off > 0.534 (AUC 0.67)                                                                                     |
| Almagor et al., 2004   | IVF      | 72        | 22                 | 50                     | After embryo implantation (D-ET + I0)                                                                | Significantly ↑ in non-pregnant women with DOR (*)                                                                                                                        | 0.98 ± 0.15 versus 0.24 ± 0.03 mg/L; cut-off > 0.317 (AUC 0.89)                                                                                |
| Sacks et al., 2004     | IVF      | 135       | 40                 | 95                     | After embryo implantation (D-ET + I4)                                                                | ≈ in pregnant women (ns)                                                                                                                                                  | 9.9 ± 12.1 versus 11.5 ± 6.4                                                                                                                   |
| Seckin et al., 2012    | IVF      | 69        | 35                 | 34                     | After embryo implantation (D-ET + 7)                                                                 | Significantly ↓ in non-pregnant women (****)                                                                                                                              | 2.1 ± 1.9 versus 5.8 ± 6.8                                                                                                                     |
| Yildizfer et al., 2015 | IVF      | 26        | 8                  | 18                     | After embryo implantation (D-ET + I5)                                                                | ≈ in pregnant women (ns)<br>≈ in non-pregnant women (ns)                                                                                                                  | 9.14 ± 11.36 versus 10.58 ± 11.35<br>8.4 ± 1.0 versus 7.2 ± 0.8                                                                                |

ET: embryo transfer; DOR: diminished ovarian reserve; ns: non-significant; \* P &lt; 0.05; \*\*\*\* P &lt; 0.001.

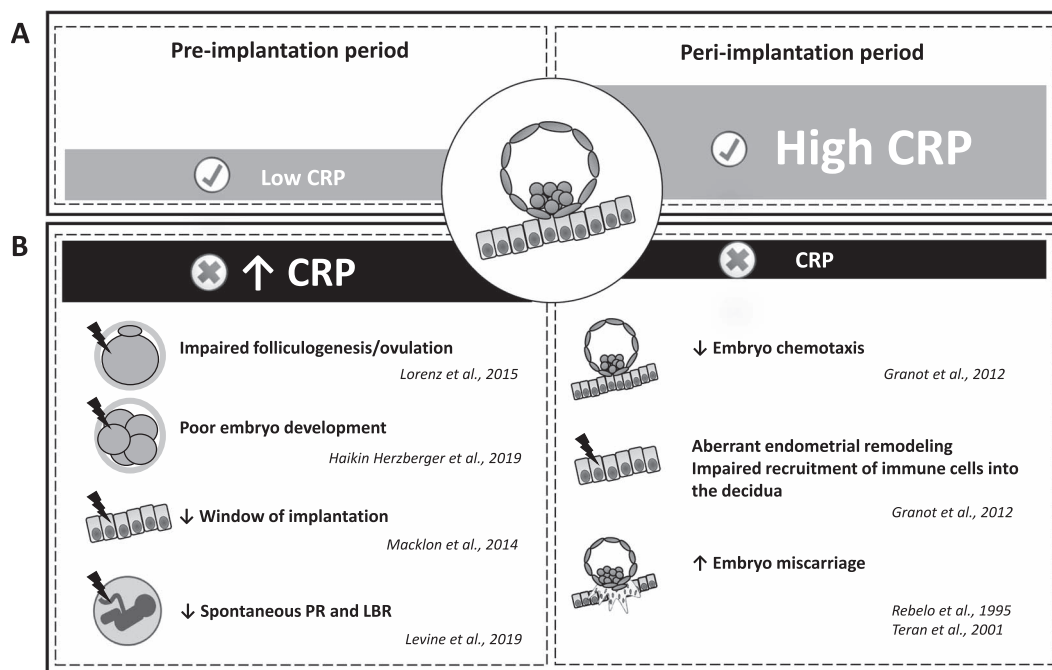

**Figure 3** Proposed model of CRP regulation and roles in ART cycles. (A) Modulation of circulating CRP values before and after embryo implantation in optimal ART cycles. (B) Potential effects of CRP dysregulation on ART outcomes. PR: pregnancy rates; LBR: live birth rates.

versus  $1.2 \pm 1.0$  mg/L, respectively;  $P=0.01$ ) (Almagor et al., 2004). They suggested that a CRP ratio  $<1.85$  could be a predictive marker of IVF outcome (sensitivity: 86%; specificity: 44%) (Almagor et al., 2004).

### Serum CRP quantification during early embryo implantation and ART outcomes

The association between CRP levels after embryo implantation and ART outcomes were evaluated in four studies in women undergoing IVF. To date, no study assessed this association in women undergoing IUI cycles.

### CRP and IVF outcomes

These four studies evaluated the relationship between IVF outcomes and serum CRP concentration during the early embryo implantation period (i.e. from Day 7 to Day 15 after embryo transfer) (Almagor et al., 2004; Sacks et al., 2004; Seckin et al., 2012; Yildizfer et al., 2015). Only one study found that CRP concentration at Day 14 after embryo transfer was significantly lower in the non-pregnant group compared with the pregnant group ( $P < 0.0001$ ) (Sacks et al., 2004). The other three studies reported similar CRP values in both groups (Almagor et al., 2004; Seckin et al., 2012; Yildizfer et al., 2015).

## Discussion

The available published data on circulating CRP values and ART outcomes suggest that high serum CRP concentrations before embryo

implantation could be associated with subsequent ART failure (Fig. 3). Conversely, high circulating CRP values during the early embryo implantation period might be positively associated with successful pregnancy in women undergoing ART (Fig. 3). However, these results need to be considered with caution because of the limited number of studies and their considerable differences in design, population and methods.

### Available data on circulating CRP concentration and ART outcomes

Most of the reviewed studies support the association between high CRP values before embryo implantation and subsequent ART failure (Almagor et al., 2004; Sacks et al., 2004; Wunder et al., 2005; Tasdemir et al., 2015; Yildizfer et al., 2015; Buyuk et al., 2017; Sahin et al., 2018). Only one study reported a significant decrease in CRP values in non-pregnant women before embryo implantation (Arefi et al., 2010), but this study had the lowest NOS score (i.e. 3/10) and did not provide a definition of pregnancy. Moreover, the results of the study of Arefi et al. (2010) were weakened also by the absence of information on the women's BMI. Indeed BMI positively influences circulating CRP concentration in women undergoing ART (Wunder et al., 2005; Levin et al., 2007; Robinson et al., 2008; Yildizfer et al., 2015; Buyuk et al., 2017).

The other studies included in the systematic review also have limitations. Only a minority of studies reported the predictive value of circulating CRP concentration on ART outcomes, with the appropriate information on cut-offs, sensitivity, specificity and positive and negative predictive values (Almagor et al., 2004; Buyuk et al., 2017). Moreover,

most studies found either normal (i.e. <2 mg/L) (Sacks *et al.*, 2004; Wunder *et al.*, 2005; Robinson *et al.*, 2008; Tasdemir *et al.*, 2015; Buyuk *et al.*, 2017) or high baseline CRP concentrations (i.e. between 2 and 10 mg/L, reflecting low-grade inflammation) (Arefi *et al.*, 2010; Seckin *et al.*, 2012) in both pregnant and non-pregnant groups, thus potentially preventing the observation of a significant influence on ART outcomes. The small number of patients (Tasdemir *et al.*, 2015; Sahin *et al.*, 2018) and/or the high number of excluded patients (Almagor *et al.*, 2004) also limited the statistical power of the studies. Particularly, the number of women who achieved pregnancy was very low in two studies (Tasdemir *et al.*, 2015; Yildizfer *et al.*, 2015). Moreover, the available studies evaluated ART outcomes using heterogeneous primary endpoints (i.e. biochemical or clinical pregnancy rates). In addition, these endpoints are insufficient because the goal of ART is the birth of a healthy child. To date, no study evaluated the association between circulating CRP concentrations and live birth rates in women undergoing ART. Importantly, many clinical parameters were missing or were significantly different between the pregnant and non-pregnant groups, although they strongly influence CRP values or IVF outcomes. For instance, women's age is strongly associated with pregnancy rates, due to less responsive ovaries and/or altered oocyte quality in older women (American College of *et al.*, 2014; Crawford & Steiner, 2015). Hence, female age is a confounding variable for ART outcomes because it is highly associated with the biochemical and clinical pregnancy rates (Artini *et al.*, 2018). In five studies (Sacks *et al.*, 2004; Wunder *et al.*, 2005; Tasdemir *et al.*, 2015; Buyuk *et al.*, 2017; Sahin *et al.*, 2018), women who became pregnant had lower circulating CRP values; however, they were significantly younger than those who did not. This suggests that the differences in pregnancy rates could have been influenced by age rather than CRP values. Women's age was missing in one study (Robinson *et al.*, 2008). Therefore, the authors could not take into account the influence of age in their analysis, undermining the data interpretation. Another confounding variable was BMI that is highly associated with serum CRP concentrations (Ford, 1999; Visser *et al.*, 1999; Yudkin *et al.*, 1999; Festa *et al.*, 2001; Rexrode *et al.*, 2003; Wunder *et al.*, 2005; Thorand *et al.*, 2006; Levin *et al.*, 2007; Robinson *et al.*, 2008; Ertas *et al.*, 2010; Yildizfer *et al.*, 2015; Buyuk *et al.*, 2017). Yet, BMI was not given in 20.0% (2/10) of studies (Almagor *et al.*, 2004; Arefi *et al.*, 2010). Pregnancy rates are also strongly influenced by several ART parameters. For instance, the number and quality of inseminated spermatozoa were missing in 50.0% (1/2) of studies on IUI (Sahin *et al.*, 2018). Moreover, the number and quality of transferred embryo(s) strongly influence pregnancy rates. Yet, the number of transferred embryo was missing in 30.0% (3/10) of studies (Almagor *et al.*, 2004; Robinson *et al.*, 2008; Buyuk *et al.*, 2017), and their quality was never mentioned. Many factors associated with COH and/or ovarian puncture also may affect CRP values, thus representing potential sources of bias and confounding factors. Recent studies reported that COH is associated with an increase in inflammatory cytokines, such as CRP (Orvieto *et al.*, 2004; Orvieto *et al.*, 2005; Wunder *et al.*, 2005; Orvieto *et al.*, 2006; Orvieto *et al.*, 2007; Arefi *et al.*, 2010; Korhonen *et al.*, 2016). The effect of the high doses of gonadotropins used in IVF on inflammatory and oxidative stress markers is currently unclear. Moreover, additional studies are needed to determine whether gonadotropins directly affect CRP secretion. For instance, the impact of FSH on CRP production is unknown. A recent study reported the upregulation of inflammation-related genes

(i.e. genes involved in prostaglandin synthesis, interleukin (IL) signaling and immune cell trafficking) in human granulosa cells among women undergoing COH at the time of hCG trigger (Wissing *et al.*, 2014). Replacing hCG with GnRH agonists for the final ovarian maturation results in a lower degree of systemic inflammation (Orvieto *et al.*, 2006). Therefore, the molecule(s) and dose of gonadotropins used for COH may influence circulating CRP concentration, representing a potential bias in the published studies. Finally, no or few data were available on ongoing infection/trauma and on the intake of anti-inflammatory drugs (e.g. ibuprofen and acetaminophen) in the selected studies, despite their effect on CRP values. Altogether, the high level of incomplete data among studies strongly undermines their strength. It may also explain the result discrepancy and the failure to reach statistical significance in some comparisons between women who did and did not achieve pregnancy. Well-designed large-scale studies are required to evaluate the predictive value of CRP quantification in ART outcomes. Importantly, analyses should be adjusted for the major variables that influence CRP and/or ART outcomes (e.g. maternal age, BMI, number of transferred embryos, use of anti-inflammatory drugs).

Despite these limitations, the association between high circulating CRP levels before embryo implantation and poor reproductive outcomes is consistent with the decreased fertility observed in women with high preconception CRP levels ( $\geq 1.95$  mg/L) (Sjaarda *et al.*, 2017). Moreover, elevated CRP values have been reported in women with reproductive disorders, including PCOS (Kelly *et al.*, 2001; Escobar-Morreale, Luque-Ramirez, & Gonzalez, 2011; Agacayak *et al.*, 2015; Kahyaoglu *et al.*, 2017), OHSS (Orvieto, 2004; Sacks *et al.*, 2004; Levin *et al.*, 2005; Korhonen *et al.*, 2016) and endometriosis (Kianpour *et al.*, 2012). The association between increased inflammation and poor reproductive outcomes has been corroborated using other circulating inflammatory factors. For instance, Persson and colleagues reported higher IL-5 secretion by peripheral blood mononuclear cells at ovarian puncture time in women who did not become pregnant after IVF compared with women who did (Persson *et al.*, 2012).

Altogether, these findings suggest a detrimental impact of high circulating CRP during preconception on oocyte competence, embryo development and/or endometrial receptivity (Fig. 3B). Previous studies suggested that high circulating CRP concentrations have a negative effect on folliculogenesis. For instance, Lorenz *et al.* reported significantly higher CRP values during the early follicular phase in anovulatory cycles compared with ovulatory cycles (Lorenz *et al.*, 2015). Moreover, Buyuk and colleagues found that the CRP cut-off value to predict IVF outcome was lower and with better sensitivity and specificity in women with diminished ovarian than for women with normal ovarian reserve before COH (Buyuk *et al.*, 2017). Other studies reported the association between poor folliculogenesis and increased expression of other inflammatory markers. For instance, increased serum resistin levels and intrafollicular TNF- $\alpha$  levels are negatively associated with the number (Chen *et al.*, 2007) and quality (Lee *et al.*, 2000) of oocytes in women undergoing IVF. The exact role of CRP in impaired folliculogenesis remains to be characterized in women undergoing ART. CRP concentration seems slightly higher in serum compared with follicular fluid on ovarian puncture day (Orvieto *et al.*, 2004; Wunder *et al.*, 2005; Haikin Herzberger *et al.*, 2019). Moreover, CRP concentrations in serum and follicular fluid are strongly correlated (Wunder *et al.*, 2005; Haikin Herzberger *et al.*, 2019), suggesting that CRP quantification in serum may be a surrogate marker of follicular fluid level CRP during

COH. To date, no data on CRP production by cultured ovarian cells has been reported. Future studies on the impact of follicular fluid CRP on oocyte competence could be useful to help determine the role of CRP in human folliculogenesis/oogenesis.

Concerning the impact of CRP on embryo development, a recent finding reported that high serum CRP levels ( $\geq 5$  mg/L) on ovarian puncture day were significantly associated with low embryo quality (Haikin Herzberger et al., 2019), suggesting a detrimental impact of circulating CRP on oocyte competence and early embryo development. Radin et al. found that high preconception serum CRP levels preferentially affect male embryo implantation and/or development in humans (Radin et al., 2015), corroborating the detrimental effect of maternal inflammation on male embryos observed in animal models (Perez-Crespo et al., 2005; Dobbs et al., 2014). Interestingly, low-dose aspirin treatment reduces circulating CRP in women with high CRP levels ( $\geq 1.95$  mg/L), restoring the normal offspring sex ratio (Radin et al., 2015).

The association between high circulating preconception CRP and poor ART outcomes could also result from a detrimental CRP effect on endometrial receptivity. It has been suggested that an excessive inflammatory response in decidual cells reduces the window of receptivity (Macklon & Brosens, 2014), increasing conception delay and favoring recurrent implantation failure after IVF. Moreover, low-grade inflammation might be a cause of implantation failure of chromosomally normal embryos (Macklon & Brosens, 2014).

On the other hand, high circulating CRP values appear to be positively associated with pregnancy after embryo implantation (Sacks et al., 2004) (Fig. 3). This result is in agreement with the data (reviewed in Granot et al., 2012) on the presence of local and systemic pro-inflammatory signals during early pregnancy. Indeed, a gradient of chemokines and cytokines is produced by endometrial cells to guide the blastocyst to the implantation site (Granot et al., 2012). Moreover, the growing embryo secretes IL-1 that promotes CRP production (Pepys & Hirschfield, 2003). Pro-inflammatory cytokines, such as IL-6, leukemia inhibitory factor, IL-8 and TNF- $\alpha$ , also participate in endometrial remodeling and in the recruitment of immune cells into the decidua (Granot et al., 2012), indicating the presence of an inflammatory state during the early stages of implantation. Likewise, Persson and colleagues reported higher IL-4, IL-5 and IL-13 secretion from peripheral blood mononuclear cells at Week 4 after embryo transfer (Persson et al., 2012). Moreover, CRP significantly increases throughout pregnancy from the first to the third trimester (Rebello, Carvalho-Guerra, Pereira-Leite, & Quintanilha, 1995; Teran et al., 2001). One can speculate that CRP concentration reduction during the peri-implantation period is detrimental for the establishment of early pregnancy (Fig. 3B). Intriguingly, several studies found similar CRP values during the post-implantation period in women who did and did not achieve pregnancy after ART (Almagor et al., 2004; Seckin et al., 2012; Yildizfer et al., 2015). The limited inflammatory process at the implantation site at Week 4 of gestation might not be able to significantly influence the concentration of circulating inflammation markers, thus explaining this observation. Indeed, blastocyst adhesion to the receptive endometrium takes place  $\sim 6$ – $7$  days after ovulation trigger, but the connection between the invading blastocyst and maternal vessels only begins  $\sim 8$ – $9$  days after ovulation trigger (Lohstroh et al., 2005). Therefore, it is thought that the molecular signals associated with embryo implantation appear in the maternal circulation at Days

8–9 after ovulation trigger. Consequently, CRP levels might significantly increase only later during pregnancy (e.g. at 6–8 weeks of gestation).

### Clinical benefits and limitations of CRP quantification for predicting ART outcomes

The validation of predictive biomarkers that can guide treatment options is necessary to improve ART outcomes. The quantification of serum CRP before starting COH seems particularly promising for predicting the likelihood of achieving a pregnancy. Moreover, the detection of high CRP concentration in women before COH could help to identify low-prognosis ART cycles, guiding towards IVF cycle cancellation to minimize the medical risks and costs as well as the psychological burden. CRP quantification has already been proposed for the prediction of pregnancy pathologies, such as pregnancy loss (Ahmed et al., 2015), gestational diabetes (Wolf et al., 2003), pre-eclampsia (Teran et al., 2001; Wolf et al., 2001; Thilaganathan et al., 2010; Tjoa et al. 2003), intrauterine growth restriction (Tjoa et al., 2003), preterm delivery (Hvilsom et al., 2002; Lohsoonthorn, Qiu, & Williams, 2007) and premature rupture of membranes complicated by chorioamnionitis (Yoon et al., 1996). Altogether, the available data suggest that CRP could represent a useful biomarker for the personalized management of patients undergoing ART. Indeed, CRP is an attractive screening tool because its quantification is highly sensitive, simple, inexpensive, rapid and relatively standardized. Currently, hsCRP displays the most suitable characteristics for routine clinical use among all identified inflammatory markers (Pearson et al., 2003). The nephelometric assay was the first method approved by the US Food and Drug Administration for assessing low-grade inflammation (Roberts et al., 2001). Immunoturbidimetry-based assays are the most commonly used methods in clinical settings. Both technologies usually allow detecting CRP with a sensitivity (i.e. limit of quantification) of  $\sim 1$  mg/L (Vashist et al., 2016). Moreover, fasting before sampling may be needed in assays that depend on optical clarity, such as turbidimetry and nephelometry (Myers et al., 2004). High-sensitivity methods are required for the quantification of low levels of CRP. Clinically accredited or in-house ELISA kits display sensitivities of  $10^{-9}$  mg/L, although they may lack adequate standardization (Vashist et al., 2016). In a previous study, all the most commonly used methods were standardized using a unique international standard (IFCC Certified Reference Material 470 standard) (Roberts et al., 2001), and hsCRP concentrations measured by ELISA assay, immunoturbidimetric and nephelometric automated methods were comparable (Rifai, Tracy, & Ridker, 1999; Roberts et al., 2001). However, further standardization efforts and stringent calibration are still required to ensure high reproducibility (Wu et al., 2017). Moreover, the appropriate CRP cut-off still needs to be determined to predict the success or failure of embryo implantation. Some studies reported very different CRP reference values:  $< 3$  mg/L (Korhonen et al., 2016),  $< 5$  mg/L (Almagor et al., 2004; Orvieto et al., 2004; Orvieto et al., 2006) or even  $< 50$  mg/L (Kahyaoglu et al., 2017). Several studies did not mention any reference value (Levin et al., 2007; Robinson et al., 2008; Liu et al., 2014; Yildizfer et al., 2015). Altogether, the limited data on CRP levels in women undergoing ART do not allow the normal CRP reference ranges in this population to be established. For clinical use, hsCRP tests should be preferred to detect low circulating levels of CRP (0.5–10 mg/L), indicative of low-grade inflammation (Ansar & Ghosh, 2013). Obviously, CRP should be



measured in the absence of ongoing inflammatory conditions to reflect the baseline systemic environment. Importantly, CRP test results can vary among laboratories. Therefore, serial CRP assessments should be performed by a single laboratory to minimize errors. Moreover, two measurements using a hsCRP assay (optimally 2 weeks apart) are recommended to increase the result reliability (Myers *et al.*, 2004). CRP levels are stable, without circadian variation (Meier-Ewert *et al.*, 2001), allowing its detection at any time of the day.

## CRP-lowering therapeutic options and ART outcomes

Circulating CRP concentration is influenced by genetic and environmental factors. For example, CRP concentrations are more similar in monozygotic twins than in dizygotic twins (MacGregor, Gallimore, Spector, & Pepys, 2004), and adiposity strongly influences CRP values in monozygotic twins (Greenfield *et al.*, 2004). Modification of environmental factors, such as lifestyle factors (e.g. weight loss, specific dietary patterns and physical activity), and pharmacological treatments (e.g. low-dose aspirin, steroids and tamoxifen) can lower the circulating CRP concentration and might improve reproductive outcomes (Table V).

### Lifestyle factors

Weight loss is associated with decreased circulating levels of inflammatory markers, including CRP (Tchernof, Nolan, Sites, Ades, & Poehlman, 2002; Forsythe, Wallace, & Livingstone, 2008; Christiansen, Paulsen, Bruun, Pedersen, & Richelsen, 2010; Varady *et al.*, 2013; Goldberg, Temprosa, Mather, Orchard, & Kitabchi, 2014; Bianchi, 2018), and also with higher cumulative ovulation rates in women with PCOS (Legro *et al.*, 2015), higher pregnancy rates in infertile couples (Best, Avenell, & Bhattacharya, 2017) and higher spontaneous live birth rates in women using ART (Mutsaerts *et al.*, 2016; Einarsson *et al.*, 2017). Moreover, weight loss also significantly increases clinical pregnancy rates, cumulative live birth rates and the number of live births, while it significantly decreases the time to pregnancy in women with obesity undergoing IVF (Sim, Dezarnaulds, Denyer, Skilton, & Caterson, 2014; Espinos *et al.*, 2017). On the other hand, increasing evidence indicates that dietary patterns affect circulating CRP and reproductive function, irrespectively of weight loss (Kermack & Macklon, 2015). Circulating CRP values can be decreased by lower glycemic index diets (Gaskins *et al.*, 2010; Buyken *et al.*, 2014), higher fiber intake (Ajani, Ford, & Mokdad, 2004), vegan diets (Sutcliffe, Wilson, de Heer, Foster, & Carnot, 2015), Mediterranean-style diets (Esposito *et al.*, 2004), ginseng supplementation (Saboori, Falahi, Yousefi Rad, Asbaghi, & Khosroshahi, 2019) and antioxidant supplementation (multivitamin, vitamins E or C, beta carotene) (Colbert *et al.*, 2004). It has been shown that several dietary patterns (e.g. vegetarian diets, low-fat and low glycemic index diets, intake of folate or antioxidants) improve reproductive outcomes (McLean & Wellons, 2012, Practice Committee of the American Society for Reproductive Medicine in collaboration with the Society for Reproductive *et al.*, 2017)), by decreasing the risk of ovulatory disorders (Chavarro, Rich-Edwards, Rosner, & Willett, 2007) and increasing the number of retrieved oocytes (Becker, Passos, & Moulin, 2015), the IVF fertilization rates (Gaskins *et al.*, 2014), the pregnancy rates after IVF (Moran, Tsagareli, Noakes, & Norman, 2016) and the live birth rates (Gaskins *et al.*, 2015; Gaskins *et al.*, 2016), while reducing IVF cycle failure (Gaskins *et al.*,

2014). Physical activity also significantly decreases CRP concentrations (Aronson *et al.*, 2004; Colbert *et al.*, 2004). Interestingly, physical activity is associated with improved fertility, including in women with overweight and obesity (Wise *et al.*, 2012; McKinnon *et al.*, 2016). Moreover, physical activity significantly increases pregnancy and live birth rates in women with obesity undergoing IVF, irrespectively of body weight loss (Palomba *et al.*, 2014). The combination of different lifestyle factors synergistically results in higher reproductive outcomes (Chavarro *et al.*, 2007).

### CRP-lowering drugs

Several CRP-lowering drugs have shown beneficial effects on spontaneous fertility or ART outcomes. Here, only drugs with a proven effect on the reduction of circulating CRP and associated with a beneficial effect on early conception in women will be presented. Recent studies revealed that low-dose aspirin treatment significantly decreases CRP levels in women with high baseline CRP levels ( $\geq 1.95$  mg/L), but not in women with low baseline CRP values (Sjaarda *et al.*, 2017). Moreover, preconception low-dose aspirin treatment significantly improves spontaneous clinical pregnancy and live birth rates only in lean women (BMI  $\leq 25$  kg/m<sup>2</sup>) with high baseline CRP ( $\geq 1.95$  mg/L) (Sjaarda *et al.*, 2017). The most recent meta-analysis reported that in women with undocumented inflammation status, low-dose aspirin significantly improves clinical pregnancy rate in IVF/ICSI cycles compared with placebo or no treatment, but not the implantation or live birth rates (Wang *et al.*, 2017). This increase in clinical pregnancy rate might be the result of ovarian and endometrial effects of low-dose aspirin. Indeed, low-dose aspirin significantly improves ovarian folliculogenesis (Rubinstein, Marazzi, & de Fried, 1999; Wang *et al.*, 2017) and oocyte competence (Rubinstein *et al.*, 1999), probably by promoting follicular vascularization (Rubinstein *et al.*, 1999). Therefore, preconception low-dose aspirin treatment may optimize the vascular distribution of gonadotropins and other growth factors in growing ovarian follicles and consequently improve oocyte maturation and embryo implantation. Moreover, low-dose aspirin treatment significantly improves endometrial receptivity (Rubinstein *et al.*, 1999; Hsieh, Tsai, Chang, Lo, & Chen, 2000). Steroid treatment also reduces CRP levels in different inflammatory states (Sin, Lacy, York, & Man, 2004) and significantly decreases clinical pregnancy loss and improves live birth rates in women undergoing IVF (Shirlow, Healey, Volovsky, MacLachlan, & Volenhoven, 2017). Metformin significantly decreases CRP levels in lean and overweight women with PCOS (Chen *et al.*, 2017) and significantly improves ovulation and clinical pregnancy rates compared with placebo (Morley, Tang, Yasmin, Norman, & Balen, 2017). Acupuncture also significantly decreases CRP values (Attia *et al.*, 2016) and may increase clinical pregnancy and live birth rates (Hullender Rubin, Anderson, & Craig, 2018). Manheimer and colleagues suggested that acupuncture has stronger effects in women with lower baseline pregnancy rates during ART (Manheimer *et al.*, 2013). Additional clinical studies are needed to assess the relationship between CRP-lowering drugs and ART outcomes.

All these innovative approaches may contribute to the normalization of low-grade inflammation, thus increasing the clinical pregnancy and live birth rates. Importantly, the most appropriate time to start CRP-lowering therapies (e.g. before or during ART cycles) and their duration must be carefully determined. For example, postponing fertility



**Table V** CRP-lowering environmental factors and drugs and their impact on human fertility.

| CRP-lowering environmental factors and drugs | Impact on fertility                                                        | References                                                                |                                                           |                                              |
|----------------------------------------------|----------------------------------------------------------------------------|---------------------------------------------------------------------------|-----------------------------------------------------------|----------------------------------------------|
| Environmental factors                        | Weight loss                                                                | ↑ spontaneous PR in infertile patients                                    | Mutsaerts et al., 2016<br>Einarsson et al., 2017          |                                              |
|                                              |                                                                            | ↑ PR and LBR in women with obesity undergoing IVF                         | Best et al., 2017<br>Espinosa et al., 2017                |                                              |
|                                              | Diet patterns                                                              | ↓ TTP in women with obesity undergoing IVF                                | Sim et al., 2014                                          |                                              |
|                                              |                                                                            | ↓ risk of ovulatory disorders                                             | Chavarro et al., 2007                                     |                                              |
|                                              |                                                                            | ↑ number of retrieved oocytes in women with overweight/obesity during IVF | Becker et al., 2015                                       |                                              |
|                                              |                                                                            | ↑ fertilization rates in women undergoing IVF                             | Gaskins et al., 2014                                      |                                              |
|                                              | Drugs                                                                      | Physical activity                                                         | ↓ cycle failure in women undergoing IVF                   | Gaskins et al., 2014<br>Gaskins et al., 2015 |
|                                              |                                                                            |                                                                           | ↑ PR and LBR in women undergoing IVF                      | Moran et al., 2016<br>Gaskins et al., 2016   |
|                                              |                                                                            | Low-dose aspirin                                                          | ↑ spontaneous fecundability in women attempting pregnancy | McKinnon et al., 2016                        |
|                                              |                                                                            |                                                                           | ↓ spontaneous TTP in women with overweight/obesity        | Wise et al., 2012                            |
| Steroids                                     |                                                                            | ↑ pregnancy and live birth rates in women with obesity undergoing IVF     | Palomba et al., 2014                                      |                                              |
|                                              |                                                                            | ↑ spontaneous PR and LBR in lean women with low-grade inflammation        | Levine et al., 2019                                       |                                              |
| Drugs                                        | Metformin                                                                  | ↓ spontaneous TTP in women attempting pregnancy                           | Levine et al., 2019                                       |                                              |
|                                              |                                                                            | ↓ pregnancy loss in women undergoing IVF                                  | Shirlow et al., 2017                                      |                                              |
|                                              | Tamoxifen                                                                  | ↑ LBR in women undergoing IVF                                             | Shirlow et al., 2017                                      |                                              |
|                                              |                                                                            | ↑ ovulation in women with PCOS undergoing ovulation induction             | Morley et al., 2017                                       |                                              |
| Acupuncture                                  | ↑ PR in women with PCOS undergoing ovulation induction                     | Morley et al., 2017                                                       |                                                           |                                              |
|                                              | ↑ PR in women with thin endometrium and undergoing IUI                     | Wang et al., 2017                                                         |                                                           |                                              |
|                                              | ↓ early pregnancy loss in women with a thin endometrium and undergoing IUI | Wang et al., 2017                                                         |                                                           |                                              |
|                                              | ↑ PR and LBR in women undergoing IVF                                       | Manheimer et al., 2013<br>Hullender Rubin et al., 2018                    |                                                           |                                              |

PR: pregnancy rate; LBR: live birth rate; TTP: time to pregnancy; PCOS: polycystic ovary syndrome.

treatment for weight loss may be detrimental due to the risk associated with age-related fertility decline (Sabounchi, Hovmand, Osgood, Dyck, & Jungheim, 2014; Tremellen, Wilkinson, & Savulescu, 2017). Moreover, the local inflammatory response is an important feature during the earliest phases of pregnancy. Therefore, one can speculate that CRP-lowering treatments should be initiated before the start of COH. Once CRP values are normalized, CRP-lowering drugs should be stopped before starting the ART cycle. Indeed, no beneficial effect was observed when low-dose aspirin treatment was initiated after conception or during early pregnancy (Di Nisio et al., 2005).

In addition, preconception BMI and CRP levels seem to modify significantly the efficacy of CRP-lowering drugs (Sjaarda et al., 2017). This is consistent with data showing that CRP-lowering environmental factors do not improve markers of inflammation in healthy individuals (Villalba et al., 2019). Altogether, these results suggest that these therapeutic strategies might be more beneficial in women with low-grade inflammation. Future larger and properly powered studies with

adequate sample sizes and methodology should focus on the effects of CRP-lowering environmental factors and drugs on IVF outcomes in women with low-grade inflammation to confirm these preliminary findings. In particular, future studies should include both preconception basal CRP level and BMI to evaluate the clinical usefulness of CRP quantification and of preconception therapeutic options in the management of women undergoing ART. CRP quantification before ART may identify subgroups of patients who might benefit from CRP-lowering environmental factors and drugs. Until then, clinicians should recommend a healthy lifestyle. Indeed, all patients should be given clear information about preconception health, including advice about lifestyle factors (Lane, Robker, & Robertson, 2014; Norman, 2015). As dropouts are common in lifestyle improvement programs (Mutsaerts, Kuchenbecker, Mol, Land, & Hoek, 2013), additional emotional support and encouragement are highly recommended. Conversely, clinicians should not endorse taking unproven and unnecessary pharmacological compounds that may have no beneficial effect on ART success rate.

Indeed, the mechanisms by which these drugs decrease CRP values and improve ART outcomes remain unclear. Although CRP is already considered a clinically useful biomarker in other pathologies (e.g. infection/trauma and cardiovascular risk), most mechanistic studies suggest that CRP represents a downstream surrogate marker and not a target on its own (Ridker, 2016). Consequently, CRP quantification before and after ART treatment was not performed in most studies; therefore, the improvement of pregnancy and/or live birth rates cannot be directly attributed to the reduced inflammatory state.

## Conclusion

The value of CRP quantification as a predictive marker of ART outcome needs to be better investigated in large prospective studies that take into account the main parameters influencing CRP concentration and ART outcomes (e.g. women's age and BMI, number of transferred embryo(s)). If future high-quality studies confirm the negative association between circulating CRP during preconception and ART outcomes, the quantification of circulating CRP before ART could help physicians to predict poor cycles, thus contributing to improve decision-making concerning the cancellation of an ART cycle and the initiation of prophylactic therapy to reduce systemic low-grade inflammation.

## Supplementary data

Supplementary data are available at *Human Reproduction Update* online.

## Acknowledgements

We warmly thank Elisabeth Andermarcher for her help in formulating this manuscript in English.

## Authors' roles

Study design (S.B., G.B., M.A., S.H.), execution (S.B., G.B., M.A., S.H.), analysis (S.B., G.B., M.A., S.H.), manuscript drafting (S.B., G.B., M.A., B.D.B., A.G., A.F.-H., I.T., S.H.) and critical discussion (S.B., G.B., M.A., B.D.B., A.G., A.F.-H., I.T., S.H.).

## Funding

AMROG; Université de Montpellier; Université Grenoble-Alpes.

## Conflict of interest

The authors declare no conflict of interest.

## References

Agacayak E, Tunc SY, Sak S, Basaranoglu S, Yuksel H, Turgut A, Gul T. Levels of neopterin and other inflammatory markers in obese and non-obese patients with polycystic ovary syndrome. *Med Sci Monit* 2015;**21**:2446–2455.

Ahmed SK, Mahmood N, Malalla ZH, Alsobyani FM, Al-Kiyumi IS, Almawi WY. C-reactive protein gene variants associated with recurrent pregnancy loss independent of CRP serum levels: a case-control study. *Gene* 2015;**569**:136–140.

Ahn SH, Edwards AK, Singh SS, Young SL, Lessey BA, Tayade C. IL-17A contributes to the pathogenesis of endometriosis by triggering proinflammatory cytokines and angiogenic growth factors. *J Immunol* 2015;**6**:2591–2600.

Ajani UA, Ford ES, Mokdad AH. Dietary fiber and C-reactive protein: findings from national health and nutrition examination survey data. *J Nutr* 2004;**5**:1181–1185.

Almagor M, Hazav A, Yaffe H. The levels of C-reactive protein in women treated by IVF. *Hum Reprod* 2004;**1**:104–106.

American College of, O., P. Gynecologists Committee on Gynecologic and C. Practice. Female age-related fertility decline. Committee Opinion No. 589. *Fertil Steril* 2014;**3**:633–634.

Ansar W, Ghosh S. C-reactive protein and the biology of disease. *Immunol Res* 2013;**1**:131–142.

Arefi S, Babashamsi M, Panahi PS, Asgharpour Saruyi L, Zeraati H. C-reactive protein level and pregnancy rate in patients undergoing IVF/ICSI. *Iran J Reprod Med* 2010;**8**:195–200.

Aronson D, Bartha P, Zinder O, Kerner A, Shitman E, Markiewicz W, Brook GJ, Levy Y. Association between fasting glucose and C-reactive protein in middle-aged subjects. *Diabet Med* 2004;**1**:39–44.

Artini PG, Obino ME, Vergine F, Sergiampietri C, Papini F, Cela V. Assisted reproductive technique in women of advanced fertility age. *Minerva Ginecol* 2018;**6**:738–749.

Attia AM, Ibrahim FA, Abd El-Latif NA, Aziz SW, Elwan AM, Abdel Aziz AA, Elgendy A, Elgengehy FT. Therapeutic antioxidant and anti-inflammatory effects of laser acupuncture on patients with rheumatoid arthritis. *Lasers Surg Med* 2016;**5**:490–497.

Azkargorta M, Escobes I, Iloro I *et al.* Differential proteomic analysis of endometrial fluid suggests increased inflammation and impaired glucose metabolism in non-implantative IVF cycles and pinpoints PYGB as a putative implantation marker. *Hum Reprod* 2018;**33**:1898–1906.

Becker GF, Passos EP, Moulin CC. Short-term effects of a hypocaloric diet with low glycemic index and low glycemic load on body adiposity, metabolic variables, ghrelin, leptin, and pregnancy rate in overweight and obese infertile women: a randomized controlled trial. *Am J Clin Nutr* 2015;**6**:1365–1372.

Best D, Avenell A, Bhattacharya S. How effective are weight-loss interventions for improving fertility in women and men who are overweight or obese? A systematic review and meta-analysis of the evidence. *Hum Reprod Update* 2017;**6**:681–705.

Bianchi VE. Weight loss is a critical factor to reduce inflammation. *Clin Nutr ESPEN* 2018;**28**:21–35.

Biasucci LM, CDC, AHA. CDC/AHA Workshop on Markers of Inflammation and Cardiovascular Disease: Application to Clinical and Public Health Practice: clinical use of inflammatory markers in patients with cardiovascular diseases: a background paper. *Circulation* 2004;**110**:e560–e567.

Blum CA, Muller B, Huber P, Kraenzlin M, Schindler C, De Geyter C, Keller U, Puder JJ. Low-grade inflammation and estimates of insulin resistance during the menstrual cycle in lean and overweight women. *J Clin Endocrinol Metab* 2005;**6**:3230–3235.

Boots CE, Jungheim ES. Inflammation and human ovarian follicular dynamics. *Semin Reprod Med* 2015;**4**:270–275.

- Bray C, Bell LN, Liang H, Haykal R, Kaikow F, Mazza JJ, Yale SH. Erythrocyte sedimentation rate and C-reactive protein measurements and their relevance in clinical medicine. *WJM* 2016;**6**:317–321.
- Buyken AE, Goletzke J, Joslowski G, Felbick A, Cheng G, Herder C, Brand-Miller JC. Association between carbohydrate quality and inflammatory markers: systematic review of observational and interventional studies. *Am J Clin Nutr* 2014;**4**:813–833.
- Buyuk E, Asemota OA, Merhi Z, Charron MJ, Berger DS, Zapantis A, Jindal SK. Serum and follicular fluid monocyte chemotactic protein-1 levels are elevated in obese women and are associated with poorer clinical pregnancy rate after in vitro fertilization: a pilot study. *Fertil Steril* 2017;**3**:632–640 e633.
- Capobianco G, de Muro, Cherchi GM, Formato M, Lepedda AJ, Cigliano A, Zinellu E, Dessole F, Gordini L, Dessole S. Plasma levels of C-reactive protein, leptin and glycosaminoglycans during spontaneous menstrual cycle: differences between ovulatory and anovulatory cycles. *Arch Gynecol Obstet* 2010;**2**:207–213.
- Chavarro JE, Rich-Edwards JW, Rosner BA, Willett WC. Diet and lifestyle in the prevention of ovulatory disorder infertility. *Obstet Gynecol* 2007;**5**:1050–1058.
- Chen Y, Li M, Deng H, Wang S, Chen L, Li N, Xu D, Wang Q. Impact of metformin on C-reactive protein levels in women with polycystic ovary syndrome: a meta-analysis. *Oncotarget* 2017;**21**:35425–35434.
- Chen YC, Tsai EM, Chen HS, Liu YH, Lee CH, Chou FH, Chen JJ, Chen SY, Jong SB, Chan TF. Serum resistin level is a predictor of ovarian response in in vitro fertilisation cycle. *Acta Obstet Gynecol Scand* 2007;**8**:963–967.
- Christiansen T, Paulsen SK, Bruun JM, Pedersen SB, Richelsen B. Exercise training versus diet-induced weight-loss on metabolic risk factors and inflammatory markers in obese subjects: a 12-week randomized intervention study. *Am J Physiol* 2010;**4**:E824–E831.
- Colbert LH, Visser M, Simonsick EM, Tracy RP, Newman AB, Kritchevsky SB, Pahor M, Taaffe DR, Brach J, Rubin S et al. Physical activity, exercise, and inflammatory markers in older adults: findings from the Health, Aging and Body Composition Study. *J Am Geriatr Soc* 2004;**7**:1098–1104.
- Coussons-Read ME, Okun ML, Nettles CD. Psychosocial stress increases inflammatory markers and alters cytokine production across pregnancy. *Brain Behav Immun* 2007;**3**:343–350.
- Crawford NM, Steiner AZ. Age-related infertility. *Obstet Gynecol Clin North Am* 2015;**1**:15–25.
- Dekel N, Gnainsky Y, Granot I, Racicot K, Mor G. The role of inflammation for a successful implantation. *Am J Reprod Immunol* 2014;**2**:141–147.
- Di Nisio M, Peters L, Middeldorp S. Anticoagulants for the treatment of recurrent pregnancy loss in women without antiphospholipid syndrome. *Cochrane Database Syst Rev* 2005;CD004734.
- Dobbs KB, Gagne D, Fournier E, Dufort I, Robert C, Block J, Sirard MA, Bonilla L, Ealy AD, Loureiro B et al. Sexual dimorphism in developmental programming of the bovine preimplantation embryo caused by colony-stimulating factor 2. *Biol Reprod* 2014;**3**:80.
- Dong Q, Wright JR. Expression of C-reactive protein by alveolar macrophages. *J Immunol* 1996;**12**:4815–4820.
- Du Clos TW. Function of C-reactive protein. *Ann Med* 2000;**4**:274–278.
- Einarsson S, Bergh C, Friberg B, Pinborg A, Klajnbard A, Karlstrom PO, Kluge L, Larsson I, Loft A, Mikkelsen-Englund AL et al. Weight reduction intervention for obese infertile women prior to IVF: a randomized controlled trial. *Hum Reprod* 2017;**8**:1621–1630.
- El-Shawarby SA, Sacks GP, Seyani L, Lavery SA, Trew GH. Maternal C-reactive protein levels in patients undergoing frozen embryo replacement cycles: a prospective study. *Fertil Steril* 2005;**4**:1053–1055.
- Ertas IE, Kahyaoglu S, Yilmaz B, Ozel M, Sut N, Guven MA, Danisman N. Association of maternal serum high sensitive C-reactive protein level with body mass index and severity of pre-eclampsia at third trimester. *J Obstet Gynaecol Res* 2010;**5**:970–977.
- Escobar-Morreale HF, Luque-Ramirez M, Gonzalez F. Circulating inflammatory markers in polycystic ovary syndrome: a systematic review and metaanalysis. *Fertil Steril* 2011;**3**:1048–1058 e1041–1042.
- Escobar-Morreale HF, Luque-Ramirez M, Gonzalez F. Circulating inflammatory markers in polycystic ovary syndrome: a systematic review and metaanalysis. *Fertil Steril* 2011;**95**:1048–1058 e1041–1042.
- Espinosa JJ, Polo A, Sanchez-Hernandez J, Bordas R, Pares P, Martinez O, Calaf J. Weight decrease improves live birth rates in obese women undergoing IVF: a pilot study. *Reprod Biomed Online* 2017;**4**:417–424.
- Esposito K, Marfella R, Ciotola M, Di Palo, Giugliano F, Giugliano G, D'Armiento M, D'Andrea F, Giugliano D. Effect of a mediterranean-style diet on endothelial dysfunction and markers of vascular inflammation in the metabolic syndrome: a randomized trial. *JAMA* 2004;**12**:1440–1446.
- Festa A, D'Agostino R Jr, Williams K, Karter AJ, Mayer-Davis EJ, Tracy RP, Haffner SM. The relation of body fat mass and distribution to markers of chronic inflammation. *Int J Obes Relat Metab Disord* 2001;**10**:1407–1415.
- Ford E. Body mass index, diabetes, and C-reactive protein among U.S. adults. *Diabetes Care* 1999;**12**:1971–1977.
- Ford ES, Giles WH, Myers GL, Rifai N, Ridker PM, Mannino DM. C-reactive protein concentration distribution among US children and young adults: findings from the National Health and Nutrition Examination Survey, 1999–2000. *Clin Chem* 2003;**8**:1353–1357.
- Forsythe LK, Wallace JM, Livingstone MB. Obesity and inflammation: the effects of weight loss. *Nutr Res Rev* 2008;**2**:117–133.
- Fortin CS, Leader A, Mahutte N, Hamilton S, Leveille MC, Villeneuve M, Sirard MA. Gene expression analysis of follicular cells revealed inflammation as a potential IVF failure cause. *J Assist Reprod Genet* 2019;**6**:1195–1210.
- Frohlich M, Sund M, Lowel H, Imhof A, Hoffmeister A, Koenig W. Independent association of various smoking characteristics with markers of systemic inflammation in men. Results from a representative sample of the general population (MONICA Augsburg Survey 1994/95). *Eur Heart J* 2003;**14**:1365–1372.
- Gaskins AJ, Afeiche MC, Wright DL, Toth TL, Williams PL, Gillman MW, Hauser R, Chavarro JE. Dietary folate and reproductive success among women undergoing assisted reproduction. *Obstet Gynecol* 2014;**4**:801–809.
- Gaskins AJ, Chiu YH, Williams PL, Ford JB, Toth TL, Hauser R, Chavarro JE, Team ES. Association between serum folate and vitamin B-12 and outcomes of assisted reproductive technologies. *Am J Clin Nutr* 2015;**4**:943–950.
- Gaskins AJ, Chiu YH, Williams PL, Keller MG, Toth TL, Hauser R, Chavarro JE, Team ES. Maternal whole grain intake and outcomes of in vitro fertilization. *Fertil Steril* 2016;**6**:1503–1510 e1504.

- Gaskins AJ, Mumford SL, Rovner AJ, Zhang C, Chen L, Wactawski-Wende J, Perkins NJ, Schisterman EF, BioCycle Study G. Whole grains are associated with serum concentrations of high sensitivity C-reactive protein among premenopausal women. *J Nutr* 2010;**9**:1669–1676.
- Gaskins AJ, Wilchesky M, Mumford SL, Whitcomb BW, Browne RW, Wactawski-Wende J, Perkins NJ, Schisterman EF. Endogenous reproductive hormones and C-reactive protein across the menstrual cycle: the BioCycle Study. *Am J Epidemiol* 2012;**5**:423–431.
- Gaytan M, Morales C, Bellido C, Sanchez-Criado JE, Gaytan F. Non-steroidal anti-inflammatory drugs (NSAIDs) and ovulation: lessons from morphology. *Histol Histopathol* 2006;**5**:541–556.
- Goldberg RB, Temprosa MG, Mather KJ, Orchard TJ, Kitabchi AE, Watson KE, Diabetes Prevention Program Research. Lifestyle and metformin interventions have a durable effect to lower CRP and tPA levels in the diabetes prevention program except in those who develop diabetes. *Diabetes Care* 2014;**8**:2253–2260.
- Gould JM, Weiser JN. Expression of C-reactive protein in the human respiratory tract. *Infect Immun* 2001;**3**:1747–1754.
- Granot I, Gnainsky Y, Dekel N. Endometrial inflammation and effect on implantation improvement and pregnancy outcome. *Reproduction* 2012;**6**:661–668.
- Greenfield JR, Samaras K, Jenkins AB, Kelly PJ, Spector TD, Gallimore JR, Pepys MB, Campbell LV. Obesity is an important determinant of baseline serum C-reactive protein concentration in monozygotic twins, independent of genetic influences. *Circulation* 2004;**24**:3022–3028.
- Haikin Herzberger E, Miller N, Ghetler Y, Tamir Yaniv R, Neumark E, Shulman A, Wisner A. A prospective study of C-reactive protein in patients with obesity during IVF. *Hum Fertil (Camb)* 2019;1–6.
- Hsieh YY, Tsai HD, Chang CC, Lo HY, Chen CL. Low-dose aspirin for infertile women with thin endometrium receiving intrauterine insemination: a prospective, randomized study. *J Assist Reprod Genet* 2000;**3**:174–177.
- Hullender Rubin, Anderson BJ, Craig LB. Acupuncture and in vitro fertilisation research: current and future directions. *Acupunct Med* 2018;**2**:117–122.
- Hvilsom GB, Thorsen P, Jeune B, Bakketeig LS. C-reactive protein: a serological marker for preterm delivery?. *Acta Obstet Gynecol Scand* 2002;**81**:424–429.
- Jabs WJ, Logering BA, Gerke P, Kreft B, Wolber EM, Klinger MH, Fricke L, Steinhoff J. The kidney as a second site of human C-reactive protein formation in vivo. *Eur J Immunol* 2003;**1**:152–161.
- Jilma B, Dirnberger E, Loscher I, Rimplmayr A, Hildebrandt J, Eichler HG, Kapiotis S, Wagner OF. Menstrual cycle-associated changes in blood levels of interleukin-6, alpha<sub>1</sub> acid glycoprotein, and C-reactive protein. *J Lab Clin Med* 1997;**1**:69–75.
- Kahyaoglu S, Yumusak OH, Ozyer S, Pekcan MK, Erel M, Cicek MN, Erkaya S, Tasci Y. Clomiphene citrate treatment cycle outcomes of polycystic ovary syndrome patients based on basal high sensitive C-reactive protein levels: a cross-sectional Study. *Int J Fertil Steril* 2017;**4**:320–326.
- Kelly CC, Lyall H, Petrie JR, Gould GW, Connell JM, Sattar N. Low grade chronic inflammation in women with polycystic ovarian syndrome. *J Clin Endocrinol Metab* 2001;**6**:2453–2455.
- Kermack AJ, Macklon NS. Nutritional supplementation and artificial reproductive technique (ART) outcomes. *Reprod Fertil Dev* 2015;**4**:677–683.
- Kianpour M, Nematbakhsh M, Ahmadi SM. C-reactive protein of serum and peritoneal fluid in endometriosis. *Iran J Nurs Midwifery Res* 2012;**2** Suppl 1:S115–S119.
- Kianpour M, Nematbakhsh M, Ahmadi SM. C-reactive protein of serum and peritoneal fluid in endometriosis. *Iran J Nurs Midwifery Res* 2012;**17**:S115–S119.
- Kluft C, de Maat MP. Genetics of C-reactive protein: new possibilities and complications. *Arterioscler Thromb Vasc Biol* 2003;**23**:1956–1959.
- Koenig W, Sund M, Frohlich M, Fischer HG, Lowel H, Doring A, Hutchinson WL, Pepys MB. C-reactive protein, a sensitive marker of inflammation, predicts future risk of coronary heart disease in initially healthy middle-aged men: results from the MONICA (Monitoring Trends and Determinants in Cardiovascular Disease) Augsburg Cohort Study, 1984 to 1992. *Circulation* 1999;**2**:237–242.
- Korhonen KV, Savolainen-Peltonen HM, Mikkola TS, Tiitinen AE, Unkila-Kallio LS. C-reactive protein response is higher in early than in late ovarian hyperstimulation syndrome. *Eur J Obstet Gynecol Reprod Biol* 2016;**207**:162–168.
- Kushner I, Rzewnicki D, Samols D. What does minor elevation of C-reactive protein signify? *Am J Med* 2006;**2** 166:e117–e128.
- Lane M, Robker RL, Robertson SA. Parenting from before conception. *Science* 2014;**6198**:756–760.
- Lee KS, Joo BS, Na YJ, Yoon MS, Choi OH, Kim WW. Relationships between concentrations of tumor necrosis factor-alpha and nitric oxide in follicular fluid and oocyte quality. *J Assist Reprod Genet* 2000;**4**:222–228.
- Legro RS, Dodson WC, Kris-Etherton PM, Kunselman AR, Stetter CM, Williams NI, Gnatuk CL, Estes SJ, Fleming J, Allison KC et al. Randomized controlled trial of preconception interventions in infertile women with polycystic ovary syndrome. *J Clin Endocrinol Metab* 2015;**11**:4048–4058.
- Levin I, Gamzu R, Mashiach R, Lessing JB, Amit A, Almog B. Higher C-reactive protein levels during IVF stimulation are associated with ART failure. *J Reprod Immunol* 2007;**2**:141–144.
- Levin I, Gamzu R, Pauzner D, Rogowski O, Shapira I, Maslovitz S, Almog B. Elevated levels of CRP in ovarian hyperstimulation syndrome: an unrecognised potential hazard? *BJOG* 2005;**7**:952–955.
- Levine LD, Holland TL, Kim K, Sjaarda LA, Mumford SL, Schisterman EF. The role of aspirin and inflammation on reproduction: the EAGeR trial I. *Can J Physiol Pharmacol* 2019;**97**:187–182.
- Liberati A, Altman DG, Tetzlaff J, Mulrow C, Gotzsche PC, Ioannidis JP, Clarke M, Devereaux PJ, Kleijnen J, Moher D. The PRISMA statement for reporting systematic reviews and meta-analyses of studies that evaluate health care interventions: explanation and elaboration. *J Clin Epidemiol* 2009;**10**:e1–e34.
- Liu B, Zhang L, Guo RW, Wang WJ, Duan XQ, Liu YW. The serum level of C-reactive protein in patients undergoing GnRH agonist protocols for in vitro fertilization cycle. *Clin Exp Obstet Gynecol* 2014;**2**:190–194.
- Lohsoonthorn V, Qiu C, Williams MA. Maternal serum C-reactive protein concentrations in early pregnancy and subsequent risk of preterm delivery. *Clin Biochem* 2007;**40**:330–335.



- Lohstroh PN, Overstreet JW, Stewart DR, Nakajima ST, Cragun JR, Boyers SP, Lasley BL. Secretion and excretion of human chorionic gonadotropin during early pregnancy. *Fertil Steril* 2005;**4**:1000–1011.
- Lorenz TK, Worthman CM, Vitzthum VJ. Links among inflammation, sexual activity and ovulation: evolutionary trade-offs and clinical implications. *Evol Med Public Health* 2015;**1**:304–324.
- MacGregor AJ, Gallimore JR, Spector TD, Pepys MB. Genetic effects on baseline values of C-reactive protein and serum amyloid a protein: a comparison of monozygotic and dizygotic twins. *Clin Chem* 2004;**1**:130–134.
- Macklon NS, Brosens JJ. The human endometrium as a sensor of embryo quality. *Biol Reprod* 2014;**4**:98.
- Manheimer E, van der Windt, Cheng K, Stafford K, Liu J, Tierney J, Lao L, Berman BM, Langenberg P, Bouter LM. The effects of acupuncture on rates of clinical pregnancy among women undergoing in vitro fertilization: a systematic review and meta-analysis. *Hum Reprod Update* 2013;**6**:696–713.
- Marnell L, Mold C, Du Clos. C-reactive protein: ligands, receptors and role in inflammation. *Clin Immunol* 2005;**2**:104–111.
- McConnell JP, Branum EL, Ballman KV, Lagerstedt SA, Katzmann JA, Jaffe AS. Gender differences in C-reactive protein concentrations—confirmation with two sensitive methods. *Clin Chem Lab Med* 2002;**1**:56–59.
- McKinnon CJ, Hatch EE, Rothman KJ, Mikkelsen EM, Wesselink AK, Hahn KA, Wise LA. Body mass index, physical activity and fecundability in a North American preconception cohort study. *Fertil Steril* 2016;**2**:451–459.
- McLean M, Wellons MF. Optimizing natural fertility: the role of lifestyle modification. *Obstet Gynecol Clin North Am* 2012;**4**:465–477.
- Meier-Ewert HK, Ridker PM, Rifai N, Price N, Dinges DF, Mullington JM. Absence of diurnal variation of C-reactive protein concentrations in healthy human subjects. *Clin Chem* 2001;**3**:426–430.
- Monsanto SP, Edwards AK, Zhou J, Nagarkatti P, Nagarkatti M, Young SL, Lessey BA, Tayade C. Surgical removal of endometriotic lesions alters local and systemic proinflammatory cytokines in endometriosis patients. *Fertil Steril* 2016;**4**:968–977 e965.
- Mor G, Cardenas I, Abrahams V, Guller S. Inflammation and pregnancy: the role of the immune system at the implantation site. *Ann N Y Acad Sci* 2011;**1221**:80–87.
- Moran LJ, Tzagareli V, Noakes M, Norman R. Altered preconception fatty acid intake is associated with improved pregnancy rates in overweight and obese women undertaking in vitro fertilisation. *Nutrients* 2016;**8**:10.
- Morley LC, Tang T, Yasmin E, Norman RJ, Balen AH. Insulin-sensitising drugs (metformin, rosiglitazone, pioglitazone, D-chiro-inositol) for women with polycystic ovary syndrome, oligo amenorrhoea and subfertility. *Cochrane Database Syst Rev* 2017;**11**:CD003053.
- van Mourik MS, Macklon NS, Heijnen CJ. Embryonic implantation: cytokines, adhesion molecules, and immune cells in establishing an implantation environment. *J Leukoc Biol* 2009;**1**:4–19.
- Mutsaerts MA, Kuchenbecker WK, Mol BW, Land JA, Hoek A. Dropout is a problem in lifestyle intervention programs for overweight and obese infertile women: a systematic review. *Hum Reprod* 2013;**4**:979–986.
- Mutsaerts MA, van Oers, Groen H, Burggraaff JM, Kuchenbecker WK, Perquin DA, Koks CA, van Golde, Kaaijk EM, Schierbeek JM et al. Randomized trial of a lifestyle program in obese infertile women. *N Engl J Med* 2016;**20**:1942–1953.
- Myers GL, Rifai N, Tracy RP, Roberts WL, Alexander RW, Biasucci LM, Catravas JD, Cole TG, Cooper GR, Khan BV et al. CDC and AHA. CDC/AHA workshop on markers of inflammation and cardiovascular disease: application to clinical and public health practice: report from the laboratory science discussion group. *Circulation* 2004;**25**:e545–e549.
- Nastri CO, Ferriani RA, Rocha IA, Martins WP. Ovarian hyperstimulation syndrome: pathophysiology and prevention. *J Assist Reprod Genet* 2010;**2**:3:121–128.
- Nastri CO, Teixeira DM, Moroni RM, Leitao VM, Martins WP. Ovarian hyperstimulation syndrome: pathophysiology, staging, prediction and prevention. *Ultrasound in obstetrics & gynecology : the official journal of the International Society of Ultrasound in Obstetrics and Gynecology* 2015;**4**:377–393.
- Norman RJ. 2015 RANZCOG Arthur Wilson Memorial Oration 'From little things, big things grow: the importance of periconception medicine'. *Aust N Z J Obstet Gynaecol* 2015;**55**:535–540.
- Ortiz ME, Croxatto HB. Copper-T intrauterine device and levonorgestrel intrauterine system: biological bases of their mechanism of action. *Contraception* 2007;**75**:S16–S30.
- Orvieto R. Controlled ovarian hyperstimulation—an inflammatory state. *J Soc Gynecol Investig* 2004;**7**:424–426.
- Orvieto R, Leites T, Abir R et al. Interleukin-2 production in whole blood cell cultures of women undergoing controlled ovarian hyperstimulation for assisted reproduction technology cycles. *Am J Reprod Immunol* 2003;**50**:220–223.
- Orvieto R, Zagatsky I, Yulzari-Roll V, La Marca A, Fisch B. Substituting human chorionic gonadotropin by gonadotropin-releasing hormone agonist to trigger final follicular maturation, during controlled ovarian hyperstimulation, results in less systemic inflammation. *Gynecol Endocrinol* 2006;**22**:437–440.
- Orvieto R, Chen R, Ashkenazi J, Ben-Haroush A, Bar J, Fisch B. C-reactive protein levels in patients undergoing controlled ovarian hyperstimulation for IVF cycle. *Hum Reprod* 2004;**2**:357–359.
- Orvieto R, Fisch N, Yulzari-Roll V, La Marca. Ovarian androgens but not estrogens correlate with the degree of systemic inflammation observed during controlled ovarian hyperstimulation. *Gynecol Endocrinol* 2005;**3**:170–173.
- Orvieto R, Volodarsky M, Hod E, Homburg R, Rabinson J, Zohav E, Anteby EY, Meltzer S. Controlled ovarian hyperstimulation using multi-dose gonadotropin-releasing hormone (GnRH) antagonist results in less systemic inflammation than the GnRH-agonist long protocol. *Gynecol Endocrinol* 2007;**8**:494–496.
- Orvieto R, Zagatsky I, Yulzari-Roll V, La Marca, Fisch B. Substituting human chorionic gonadotropin by gonadotropin-releasing hormone agonist to trigger final follicular maturation, during controlled ovarian hyperstimulation, results in less systemic inflammation. *Gynecol Endocrinol* 2006;**8**:437–440.
- Palomba S, Falbo A, Valli B, Morini D, Villani MT, Nicoli A, La Sala. Physical activity before IVF and ICSI cycles in infertile obese women: an observational cohort study. *Reprod Biomed Online* 2014;**1**:72–79.
- Pearson TAGA, Mensah RW, Alexander JL, Anderson RO, Cannon M 3rd, Criqui YY, Fadl SP, Fortmann Y, Hong GL, Myers N et al. Centers for Disease, Prevention and A. American Heart. Markers of inflammation and cardiovascular disease: application to clinical and



- public health practice: a statement for healthcare professionals from the Centers for Disease Control and Prevention and the American Heart Association. *Circulation* 2003;**3**:499–511.
- Pepys MB, Hirschfield GM. C-reactive protein: a critical update. *J Clin Invest* 2003;**12**:1805–1812.
- Perez-Crespo M, Ramirez MA, Fernandez-Gonzalez R, Rizos D, Lonergan P, Pintado B, Gutierrez-Adan A. Differential sensitivity of male and female mouse embryos to oxidative induced heat-stress is mediated by glucose-6-phosphate dehydrogenase gene expression. *Mol Reprod Dev* 2005;**4**:502–510.
- Persson M, Ekerfelt C, Jablonowska B, Jonsson Y, Ernerudh J, Jenmalm MC, Berg G. Immunological status in patients undergoing in vitro fertilisation: responses to hormone treatment and relationship to outcome. *J Reprod Immunol* 2012;**1**:2:58–67.
- Prabhu K, Kumar P, Adiga SK, Rao A, Lanka A, Singh J. Plasma protein thiols, ceruloplasmin, C-reactive protein and red blood cell acetylcholinesterase in patients undergoing intrauterine insemination. *J Hum Reprod Sci* 2009;**1**:27–29.
- Practice Committee of the American Society for Reproductive. M. Definition of “infertility”. *Fertil Steril* 2006;**5** Suppl 1:S228.
- Practice Committee of the American Society for Reproductive Medicine in collaboration with the Society for Reproductive, E., A. a. o. Infertility. Electronic address, E. Practice Committee of the American Society for Reproductive Medicine in collaboration with the Society for Reproductive and Infertility. Optimizing natural fertility: a committee opinion. *Fertil Steril* 2017;**1**:52–58.
- Puder JJ, Blum CA, Mueller B, De Geyter, Dye L, Keller U. Menstrual cycle symptoms are associated with changes in low-grade inflammation. *Eur J Clin Invest* 2006;**1**:58–64.
- Qi Z, Chen Y, Zhang L, Ma X, Wang F, Cheng Q, Du J, Hao Y, Chi S, Cui W. Biological variations of thirteen plasma biochemical indicators. *Clin Chim Acta* 2016;**452**:87–91.
- Radin RG, Mumford SL, Silver RM, Leshner LL, Galai N, Faraggi D, Wactawski-Wende J, Townsend JM, Lynch AM, Simhan HN *et al*. Sex ratio following preconception low-dose aspirin in women with prior pregnancy loss. *J Clin Invest* 2015;**9**:3619–3626.
- Rebello I, Carvalho-Guerra F, Pereira-Leite L, Quintanilha A. Lactoferrin as a sensitive blood marker of neutrophil activation in normal pregnancies. *Eur J Obstet Gynecol Reprod Biol* 1995;**2**:189–194.
- Rexrode KM, Pradhan A, Manson JE, Buring JE, Ridker PM. Relationship of total and abdominal adiposity with CRP and IL-6 in women. *Ann Epidemiol* 2003;**10**:674–682.
- Rifai N, Tracy RP, Ridker PM. Clinical efficacy of an automated high-sensitivity C-reactive protein assay. *Clin Chem* 1999;**12**:2136–2141.
- Roberts W, Moulton LL, Law TC, Farrow G, Cooper-Anderson M, Savory J, Rifai N. Evaluation of nine automated high-sensitivity C-reactive protein methods: implications for clinical and epidemiological applications. Part 2. *Clin Chem* 2001;**3**:418–425.
- Robinson S, Pemberton P, Laing I, Nardo LG. Low grade inflammation, as evidenced by basal high sensitivity CRP, is not correlated to outcome measures in IVF. *J Assist Reprod Genet* 2008;**8**:383–388.
- Rubinstein M, Marazzi A, de Fried. Low-dose aspirin treatment improves ovarian responsiveness, uterine and ovarian blood flow velocity, implantation, and pregnancy rates in patients undergoing in vitro fertilization: a prospective, randomized, double-blind placebo-controlled assay. *Fertil Steril* 1999;**5**:825–829.
- Saboori S, Falahi E, Yousefi Rad E, Asbaghi O, Khosroshahi MZ. Effects of ginseng on C-reactive protein level: a systematic review and meta-analysis of clinical trials. *Complement Ther Med* 2019;**45**:98–103.
- Sabounchi NS, Hovmand PS, Osgood ND, Dyck RF, Jungheim ES. A novel system dynamics model of female obesity and fertility. *Am J Public Health* 2014;**7**:1240–1246.
- Sacks GP, Seyani L, Lavery S, Trew G. Maternal C-reactive protein levels are raised at 4 weeks gestation. *Hum Reprod* 2004;**4**:1025–1030.
- Sahin A, Engin-Ustun Y, Tokmak A, Sahin H, Erkaya S, Ozgu-Erdinc AS. Serum levels of transforming growth factor beta 1 and C-reactive protein as possible markers of intra uterine insemination outcome. *Eur Cytokine Netw* 2018;**4**:121–126.
- Salker MS, Nautiyal J, Steel JH, Webster Z, Sucurovic S, Nicou M, Singh Y, Lucas ES, Murakami K, Chan YW *et al*. Disordered IL-33/ST2 activation in decidualizing stromal cells prolongs uterine receptivity in women with recurrent pregnancy loss. *PLoS One* 2012;**12**:e52252.
- Saltiel AR, Olefsky JM. Inflammatory mechanisms linking obesity and metabolic disease. *J Clin Invest* 2017;**1**:1–4.
- Seckin B, Ozaksit G, Batioglu S, Ozel M, Aydogan M, Senturk B. The relationship between the change in serum high sensitivity C-reactive protein levels and IVF success. *Gynecol Endocrinol* 2012;**6**:418–421.
- Shirlow R, Healey M, Volovsky M, MacLachlan V, Vollenhoven B. The effects of adjuvant therapies on embryo transfer success. *J Reprod Infertil* 2017;**4**:368–378.
- Sim KA, Dezarnaulds GM, Denyer GS, Skilton MR, Caterson ID. Weight loss improves reproductive outcomes in obese women undergoing fertility treatment: a randomized controlled trial. *Clin Obes* 2014;**2**:61–68.
- Sin DD, Lacy P, York E, Man SF. Effects of fluticasone on systemic markers of inflammation in chronic obstructive pulmonary disease. *Am J Respir Crit Care Med* 2004;**7**:760–765.
- Sjaarda L, Radin ARG, Swanson C, Kuhr DL, Mumford SL, Galai N, Silver RM, Wactawski-Wende J, Perkins NJ, Schisterman EF. Prevalence and contributors to low-grade inflammation in three U.S. populations of reproductive age women. *Paediatr Perinat Epidemiol* 2018;**1**:55–67.
- Sjaarda LA, Radin RG, Silver RM, Mitchell E, Mumford SL, Wilcox B, Galai N, Perkins NJ, Wactawski-Wende J, Stanford JB *et al*. Preconception low-dose aspirin restores diminished pregnancy and live birth rates in women with low-grade inflammation: a secondary analysis of a randomized trial. *J Clin Endocrinol Metab* 2017;**5**:1495–1504.
- Sutcliffe JT, Wilson LD, de Heer, Foster RL, Carnot MJ. C-reactive protein response to a vegan lifestyle intervention. *Complement Ther Med* 2015;**1**:32–37.
- Tasdemir N, Sahin A, Celik C, Abali R, Guzel S, Uzunlar O, Gulerman C. Evaluation of human chaperonin 10 and high-sensitivity C-reactive protein levels of infertile women who underwent ovulation induction and intra-uterine insemination. *J Obstet Gynaecol* 2015;**35**:707–710.
- Tchernof A, Nolan A, Sites CK, Ades PA, Poehlman ET. Weight loss reduces C-reactive protein levels in obese postmenopausal women. *Circulation* 2002;**5**:564–569.
- Teran E, Escudero C, Moya W, Flores M, Vallance P, Lopez-Jaramillo P. Elevated C-reactive protein and pro-inflammatory cytokines in

- Andean women with pre-eclampsia. *Int J Gynaecol Obstet* 2001;**3**: 243–249.
- Thiele JR, Zeller J, Bannasch H, Stark GB, Peter K, Eisenhardt SU. Targeting C-reactive protein in inflammatory disease by preventing conformational changes. *Mediators Inflamm* 2015;**2015**: 372432.
- Thilaganathan B, Wormald B, Zanardini C, Sheldon J, Ralph E, Papa-georghiou AT. Early-pregnancy multiple serum markers and second-trimester uterine artery Doppler in predicting preeclampsia. *Obstet Gynecol* 2010;**115**:1233–1238.
- Thorand B, Baumert J, Doring A, Herder C, Kolb H, Rathmann W, Giani G, Koenig W, K. Group. Sex differences in the relation of body composition to markers of inflammation. *Atherosclerosis* 2006;**1**:216–224.
- Tjoa ML, van Vugt JM, Go AT, Blankenstein MA, Oudejans CB, van Wijk IJ. Elevated C-reactive protein levels during first trimester of pregnancy are indicative of preeclampsia and intrauterine growth restriction. *J Reprod Immunol* 2003;**59**:29–37.
- Tjoa ML, van Vugt JM, Go AT, Blankenstein MA, Oudejans CB, van Wijk IJ. Elevated C-reactive protein levels during first trimester of pregnancy are indicative of preeclampsia and intrauterine growth restriction. *J Reprod Immunol* 2003;**1**:29–37.
- Tremellen K, Wilkinson D, Savulescu J. Should obese women's access to assisted fertility treatment be limited? A scientific and ethical analysis. *Aust N Z J Obstet Gynaecol* 2017;**5**:569–574.
- Vannuccini S, Clifton VL, Fraser IS, Taylor HS, Critchley H, Giudice LC, Petraglia F. Infertility and reproductive disorders: impact of hormonal and inflammatory mechanisms on pregnancy outcome. *Hum Reprod Update* 2016;**1**:104–115.
- Varady KA, Bhutani S, Klempel MC, Kroeger CM, Trepanowski JF, Haus JM, Hoddy KK, Calvo Y. Alternate day fasting for weight loss in normal weight and overweight subjects: a randomized controlled trial. *Nutr J* 2013;**1**:146.
- Vashist SK, Venkatesh AG, Marion Schneider E, Beaudoin C, Lupp PB, Luong JH. Bioanalytical advances in assays for C-reactive protein. *Biotechnol Adv* 2016;**3**:272–290.
- Villalba DK, Lindsay EK, Marsland AL, Greco CM, Young S, Brown KW, Smyth JM, Walsh CP, Gray K, Chin B et al. Mindfulness training and systemic low-grade inflammation in stressed community adults: evidence from two randomized controlled trials. *PLoS One* 2019;**7**:e0219120.
- Vinatier D, Dufour P, Tordjeman-Rizzi N, Prolongeau JF, Depret-Moser S, Monnier JC. Immunological aspects of ovarian function: role of the cytokines. *Eur J Obstet Gynecol Reprod Biol* 1995;**2**: 155–168.
- Visser M, Bouter LM, McQuillan GM, Wener MH, Harris TB. Elevated C-reactive protein levels in overweight and obese adults. *JAMA* 1999;**22**:2131–2135.
- Wang L, Huang X, Li X, Lv F, He X, Pan Y, Wang L, Zhang X. Efficacy evaluation of low-dose aspirin in IVF/ICSI patients evidence from 13 RCTs: a systematic review and meta-analysis. *Medicine (Baltimore)* 2017;**37**:e7720.
- Weiss G, Goldsmith LT, Taylor RN, Bellet D, Taylor HS. Inflammation in reproductive disorders. *Reprod Sci* 2009;**2**:216–229.
- Wener MH, Daum PR, McQuillan GM. The influence of age, sex, and race on the upper reference limit of serum C-reactive protein concentration. *J Rheumatol* 2000;**10**:2351–2359.
- Wise LA, Rothman KJ, Mikkelsen EM, Sorensen HT, Riis AH, Hatch EE. A prospective cohort study of physical activity and time to pregnancy. *Fertil Steril* 2012;**5**:1136–1142 e1131–1134.
- Wissing ML, Kristensen SG, Andersen CY, Mikkelsen AL, Host T, Borup R, Grondahl ML. Identification of new ovulation-related genes in humans by comparing the transcriptome of granulosa cells before and after ovulation triggering in the same controlled ovarian stimulation cycle. *Hum Reprod* 2014;**5**:997–1010.
- Wolf M, Kettyle E, Sandler L, Ecker JL, Roberts J, Thadhani R. Obesity and preeclampsia: the potential role of inflammation. *Obstet Gynecol* 2001;**98**:757–762.
- Wolf M, Sandler L, Hsu K, Vossen-Smirnakis K, Ecker JL, Thadhani R. First-trimester C-reactive protein and subsequent gestational diabetes. *Diabetes Care* 2003;**26**:819–824.
- Wood WG, Ludemann J, Mitusch R, Heinrich J, Maass R, Frick U. Evaluation of a sensitive immunoluminometric assay for the determination of C-reactive protein (CRP) in serum and plasma and the establishment of reference ranges for different groups of subjects. *Clin Lab* 2000;**3-4**:131–140.
- Woodward M, Rumley A, Lowe GD, Tunstall-Pedoe H. C-reactive protein: associations with haematological variables, cardiovascular risk factors and prevalent cardiovascular disease. *Br J Haematol* 2003;**1**:135–141.
- Wu C, Zhang S, Liu W, Zeng J, Zhao T, Yue Y, Zhang R, Ma H, Wang Q. Application of commutable ERM-DA474/IFCC for harmonization of C-reactive protein measurement using five analytical assays. *Clin Lab* 2017;**11**:1883–1888.
- Wu C, Zhang S, Liu W, Zeng J, Zhao T, Yue Y, Zhang R, Ma H, Wang Q. Application of Commutable ERM-DA474/IFCC for Harmonization of C-reactive Protein Measurement Using Five Analytical Assays. *Clin Lab* 2017;**63**:1883–1888.
- Wu G, Bersinger NA, Mueller MD, von Wolff. Intrafollicular inflammatory cytokines but not steroid hormone concentrations are increased in naturally matured follicles of women with proven endometriosis. *J Assist Reprod Genet* 2017;**3**:357–364.
- Wu G, Bersinger NA, Mueller MD, von Wolff M. Intrafollicular inflammatory cytokines but not steroid hormone concentrations are increased in naturally matured follicles of women with proven endometriosis. *J Assist Reprod Genet* 2017;**34**: 357–364.
- Wunder DM, Kretschmer R, Bersinger NA. Concentrations of leptin and C-reactive protein in serum and follicular fluid during assisted reproductive cycles. *Hum Reprod* 2005;**5**:1266–1271.
- Wunder DM, Kretschmer R, Bersinger NA. Concentrations of leptin and C-reactive protein in serum and follicular fluid during assisted reproductive cycles. *Hum Reprod* 2005;**20**:1266–1271.
- Wunder DM, Yared M, Bersinger NA, Widmer D, Kretschmer R, Birkhauser MH. Serum leptin and C-reactive protein levels in the physiological spontaneous menstrual cycle in reproductive age women. *Eur J Endocrinol* 2006;**1**:137–142.
- Yasojima K, Schwab C, McGeer EG, McGeer PL. Generation of C-reactive protein and complement components in atherosclerotic plaques. *Am J Pathol* 2001;**3**:1039–1051.
- Yildizfer F, Donma O, Yen M, Ekmekci O, Karatas Kul ZA, Keser Z, Esat lmal A, Cagil E, Mengi M, Ekmekci H et al. In vitro fertilization, levels of pro-inflammatory factors and lipid peroxidation. *Int J Fertil Steril* 2015;**3**:277–284.

- Yudkin JS, Stehouwer CD, Emeis JJ, Coppack SW. C-reactive protein in healthy subjects: associations with obesity, insulin resistance, and endothelial dysfunction: a potential role for cytokines originating from adipose tissue? *Arterioscler Thromb Vasc Biol* 1999;**4**:972–978.
- Yoon BH, Jun JK, Park KH, Syn HC, Gomez R, Romero R. Serum C-reactive protein, white blood cell count, and amniotic fluid white blood cell count in women with preterm premature rupture of membranes. *Obstet Gynecol* 1996;**88**:1034–1040.
